# Supplementary material for: The Nature Index: A General Framework for Synthesizing Knowledge on the State of Biodiversity
Source: PLoS One. 2011 Apr 22;6(4):e18930. doi: 10.1371/journal.pone.0018930 (PMC3081300; doi:10.1371/journal.pone.0018930)
Supplement: Table S2 — Excel file. Detailed list of indicators collected for the NI project in Norway. (XLSX) [file pone.0018930.s002.xlsx]

## Sheet: Sheet1
main major ecosystem	indicator name	scientific name	english name	measurment kind	unit kind	institution responsible	contact name	contact mail	East presence	South presence	West presence	Center presence	North presence	specific to one major habitat	specificity openlow	specificity freshwater	specificity mireswet	specificity forest	specificity mountain	specificity coastpelagic	specificity coastbottom	specificity oceanpelagic	specificity oceanbottom	Max specificity	river or lake	taxon detail	taxon broad	red list status	Ecosystem service	quick response to environmental change	trophic group	specialist1 generalist5	functional group	sensitive to agriculture or fisheries	sensitive to infrastucture	sensitive to climate change	sensitive to pollution	sensitive to invasive species	sensitive to poaching	sensitive to change in hydrological regime	sensitive to land abandonment	sensitive to eutrophication	sensitive to acidification	threatened	keystone in ecosystem	indicator related to community	reference state	scaling model	Thematic index Top Predators
freshwater	begroing_elver_eutrofierings_indeks	NA	Algae_growth_on_river_substrate_eutrofication_index	benthic_macrofauna_index	Theoric_index_previously_developped	NIVA	Susanne_Schneider	susanne.schneider@niva.no	1	1	1	1	1	Yes	0	100	0	0	0	0	0	0	0	100	R	Algae	Plant	NA	No	Yes	PP	NA	PCF	0	0	0	0	0	0	0	0	1	0	0	1	1	Theoric_index	MAX	NA
freshwater	bunndyr_elver_forventninsggsamfunn	NA	Macrofauna,_rivers	species_richness	Theoric_index_previously_developped	NIVA/NINA	Terje_Bongard/Torleif_Bækken	terje.bongard@nina.no	1	1	1	1	1	Yes	0	100	0	0	0	0	0	0	0	100	R	Insects	Invertebrate	NA	No	Yes	Mu	3	Ext	1	1	1	1	0	0	1	0	1	1	0	1	1	Pristine	LOW	NA
freshwater	dyreplankton_artssammensetning	NA	Zooplancton_composition	species_richness	Theoric_index_previously_developped	NINA/NIVA	Bjørn_Walseng/_Anders_Hobæk	bjorn.walseng@nina.no	1	1	1	1	1	Yes	0	100	0	0	0	0	0	0	0	100	L	Crustaceans	Invertebrate	NA	No	Yes	IC	3	Ext	1	1	0	0	0	0	0	0	1	1	0	1	1	Theoric_index	OPT	NA
freshwater	edelkreps	Astacus_astacus	Noble_Crayfish	Geographical_extent	area_coverage_occurence	NINA	Stein_Ivar_Johnsen	Stein.Ivar.Johnsen@nina.no	1	1	1	1	0	Yes	0	100	0	0	0	0	0	0	0	100	RL	Crustaceans	Invertebrate	EN	Yes	Yes	O	4	IC_gen	1	1	0	1	1	0	1	0	0	0	1	1	0	Pristine	OPT	NA
freshwater	elvemusling	Margaritifera_margaritifera	freshwater_pearl_mussel	Relative_density	population_size_density_biomass	NINA	Bjørn_Meidel-Larsen	bjorn.larsen@nina.no	1	1	1	1	1	Yes	0	100	0	0	0	0	0	0	0	100	R	Mollusc	Invertebrate	VU	Yes	No	Fi	2	PCF	1	1	1	1	1	1	0	0	0	0	1	1	0	Pristine	LOW	NA
freshwater	aure	Salmo_trutta	Aure	percentage_of_the_reference	expert_relative_assessment	NINA	Trygve_Hesthagen	Trygve.Hesthagen@nina.no	1	1	1	1	1	Yes	0	100	0	0	0	0	0	0	0	100	L	Actinopterygian	Vertebrate	LC	Yes	No	TP	3	TP_gen	0	0	1	1	1	1	0	0	0	1	0	1	0	Pristine	OPT	1
freshwater	flire	Abramis_bjoerkna	Silver_bream	percentage_of_the_reference	expert_relative_assessment	NINA,_rødliste	Trygve_Hesthagen	Trygve.hesthagen@nina.no	1	0	0	0	0	Yes	0	100	0	0	0	0	0	0	0	100	L	Actinopterygian	Vertebrate	NT	No	Yes	IC	3	IC_gen	0	0	0	1	0	0	1	0	0	0	0	0	0	Pristine	OPT	NA
freshwater	gjørs	Stizostedion_lucioperca	zander	percentage_of_the_reference	expert_relative_assessment	NINA,_rødliste	Trygve_Hesthagen	Trygve.hesthagen@nina.no	1	0	0	0	0	Yes	0	100	0	0	0	0	0	0	0	100	L	Actinopterygian	Vertebrate	EN	Yes	Yes	TP	1	TP_spe	0	0	0	1	0	1	1	0	0	0	1	0	0	Pristine	OPT	1
freshwater	hornulke	Myoxocephalus_quadricornis	fourhorn_sculping	percentage_of_the_reference	expert_relative_assessment	NINA,_rødliste	Trygve_Hesthagen	Trygve.hesthagen@nina.no	1	0	0	0	0	Yes	0	100	0	0	0	0	0	0	0	100	L	Actinopterygian	Vertebrate	VU	No	Yes	IC	3	IC_gen	0	0	0	1	0	0	1	0	0	0	1	0	0	Pristine	OPT	NA
freshwater	hvitfinnet_steinsmett	Cotus_gobio	european_bullhead	percentage_of_the_reference	expert_relative_assessment	NINA,_rødliste	Trygve_Hesthagen	Trygve.hesthagen@nina.no	1	0	0	0	0	Yes	0	100	0	0	0	0	0	0	0	100	L	Actinopterygian	Vertebrate	NT	No	Yes	IC	3	IC_gen	0	0	0	1	0	0	1	0	0	0	0	0	0	Pristine	OPT	NA
freshwater	laks	Salmo_salar	Atlantic_salmon	reproductive_unit	expert_relative_assessment	NINA	Peder_Fiske	Peder.Fiske@nina.no	1	1	1	1	1	No	0	100	0	0	0	0	0	0	0	100	R	Actinopterygian	Vertebrate	NA	Yes	No	TP	4	TP_gen	1	1	1	0	1	1	1	0	0	1	0	1	0	Carrying_capacity	LOW	1
freshwater	horngrimemose	Herbertus_dicranus	moss-Herbertus_dicranus	Geographical_extent	area_coverage_occurence	VM/rødliste	Kristian_Hassel	kristian.hassel@vm.ntnu.no	0	0	1	0	0	Yes	0	100	0	0	0	0	0	0	0	100	R	Bryophyta	Plant	EN	No	No	PP	1	PP_spe	0	0	0	0	0	0	1	0	0	0	1	0	0	past_knowledge	LOW	NA
freshwater	fossegrimemose	Herbertus_stramineus	moss-Herbertus_stramineus	Geographical_extent	area_coverage_occurence	VM/rødliste	Kristian_Hassel	kristian.hassel@vm.ntnu.no	0	0	1	0	0	Yes	0	100	0	0	0	0	0	0	0	100	R	Bryophyta	Plant	VU	No	No	PP	1	PP_spe	0	0	0	0	0	0	1	0	0	0	1	0	0	past_knowledge	LOW	NA
freshwater	striglekrypmose	Hygroamlystegium_fluviatile	moss-Hygroamlystegium_fluviatile	Geographical_extent	area_coverage_occurence	VM/rødliste	Kristian_Hassel	kristian.hassel@vm.ntnu.no	1	0	0	0	0	Yes	0	100	0	0	0	0	0	0	0	100	R	Bryophyta	Plant	NT	No	No	PP	1	PP_spe	0	0	0	0	0	0	1	0	0	0	0	0	0	past_knowledge	LOW	NA
freshwater	vasshalemose	Isothecium_holtii	moss-Isothecium_holtii	Geographical_extent	area_coverage_occurence	VM/rødliste	Kristian_Hassel	kristian.hassel@vm.ntnu.no	0	0	1	0	0	Yes	0	100	0	0	0	0	0	0	0	100	R	Bryophyta	Plant	EN	No	No	PP	1	PP_spe	0	0	0	0	0	0	1	0	0	0	1	0	0	past_knowledge	LOW	NA
freshwater	oter_freshwatersbestand	Lutra_lutra	Otter_in_freshwater_area	occurence	area_coverage_occurence	NINA	Jiska_van_Dijk	jiska.van.dijk@nina.no	1	1	1	1	1	Yes	0	100	0	0	0	0	0	0	0	100	NA	Mammals	Vertebrate	VU	No	Yes	TP	2	TP_spe	1	1	1	1	1	1	1	0	0	0	1	0	0	Pristine	OPT	1
freshwater	overskridelser_talegrenser_forsuring	NA	Critical_load_acid_exceedance	concentration	population_size_density_biomass	NIVA	Thorjørn_Larssen	thorjorn.larssen@niva.no	1	1	1	1	1	Yes	0	100	0	0	0	0	0	0	0	100	NA	NA	NA	NA	No	no	NA	NA	Ext	0	0	0	1	0	0	0	0	0	0	0	1	0	Maximum_sustainable_level	MAX	NA
freshwater	planteplankton_innsjoer	NA	Lake_phytoplancton	Trophic_index_(Ptacnik_et_al._Hydrobiologia_2009)	Theoric_index_previously_developped	NIVA	Birger_Skjelbred	Birger.Skjelbred@niva.no	1	1	1	1	1	Yes	0	100	0	0	0	0	0	0	0	100	L	Algae	Plant	NA	No	Yes	PP	NA	PCF	0	0	1	1	0	0	0	0	1	0	0	1	1	Theoric_index	MAX	NA
freshwater	vannplant_innsjo	NA	aquatic_flora_of_lake	Trophic_index_(Ptacnik_et_al._Hydrobiologia_2009)	Theoric_index_previously_developped	NIVA	Marit_Mjelde	marit.mjelde@niva.no	1	1	1	1	1	Yes	0	100	0	0	0	0	0	0	0	100	L	Angiosperma	Plant	NA	No	No	PP	NA	PCF	0	0	0	0	0	0	0	0	1	0	0	0	1	Theoric_index	LOW	NA
freshwater	klorofyll_a_innsjøer	NA	chlorophyll-a_in_lakes	National_EQR	Theoric_index_previously_developped	NIVA	Birger_Skjelbred	Birger.Skjelbred@niva.no	1	1	1	1	1	Yes	0	100	0	0	0	0	0	0	0	100	L	Algae	Plant	NA	No	Yes	PP	NA	PP_gen	0	0	1	0	0	0	0	0	1	0	0	1	1	Theoric_index	LOW	NA
freshwater	asp	Aspius_aspius	Asp	percentage_of_the_reference	expert_relative_assessment	NINA,_rødliste	Trygve_Hesthagen	Trygve.hesthagen@nina.no	1	0	0	0	0	Yes	0	100	0	0	0	0	0	0	0	100	L	Actinopterygian	Vertebrate	VU	Yes	Yes	TP	1	TP_spe	0	0	0	1	0	1	1	0	0	0	1	0	0	Pristine	OPT	1
freshwater	bunndyr__ASPT_indeks	NA	ASPT_index_bottomfauna	Reference_index	Theoric_index_previously_developped	NIVA	Torleif_Bækken	Torleif.Baekken@niva.no	1	1	1	1	1	Yes	0	100	0	0	0	0	0	0	0	100	R	Insects	Invertebrate	NA	No	No	Mu	NA	IC_gen	0	0	0	0	0	0	0	0	1	0	0	1	1	Theoric_index	LOW	NA
freshwater	byglandsbleke	Salmo_salar_ssp.	Salmon_ssp.	percentage_of_the_reference	expert_relative_assessment	NINA,_rødliste	Trygve_Hesthagen	Trygve.hesthagen@nina.no	0	1	0	0	0	Yes	0	100	0	0	0	0	0	0	0	100	L	Actinopterygian	Vertebrate	CR	No	Yes	IC	3	IC_gen	0	0	0	0	0	1	1	0	0	1	1	0	0	Pristine	OPT	NA
freshwater	namsblank	Salmo_salar_ssp.	Atlantic_salmon_ssp.	percentage_of_the_reference	expert_relative_assessment	NINA,_rødliste	Trygve_Hesthagen	Trygve.hesthagen@nina.no	0	0	0	1	0	Yes	0	100	0	0	0	0	0	0	0	100	R	Actinopterygian	Vertebrate	CR	No	Yes	IC	3	IC_gen	0	0	0	1	1	0	1	0	0	0	1	1	0	Pristine	OPT	NA
freshwater	bunndyr_forsuringsindeks_(Raddum_1)	NA	Acidification_index_bottomfauna	Reference_index	Theoric_index_previously_developped	NIVA	Torleif_Bækken	Torleif.Baekken@niva.no	1	1	1	1	1	Yes	0	100	0	0	0	0	0	0	0	100	R	Insects	Invertebrate	NA	No	No	Mu	NA	IC_gen	0	0	0	1	0	0	0	0	0	1	0	0	1	Theoric_index	LOW	NA
freshwater	Begroing_elver_forsurings_indeks	NA	Algae_growth_on_river_substrate_acidification_index	PIT	Theoric_index_previously_developped	NIVA	Susanne_Schneider	susanne.schneider@niva.no	1	1	1	1	1	Yes	0	100	0	0	0	0	0	0	0	100	R	Algae	Plant	NA	No	Yes	PP	NA	PCF	0	0	0	1	0	0	0	0	0	1	0	1	1	Theoric_index	LOW	NA
freshwater	fiskemake	Larus_canus	common_gull	percentage_of_the_reference	expert_relative_assessment	NINA	Jan_Ove_Gjershaug	jan.o.gjershaug@nina.no	1	1	1	1	1	Yes	0	100	0	0	0	0	0	0	0	100	L	Bird	Vertebrate	LC	Yes	no	IC	4	IC_gen	0	0	0	0	0	0	0	0	0	0	0	0	0	Pristine	LOW	NA
freshwater	fiskeorn	Pandion_haliaetus	Osprey	percentage_of_the_reference	expert_relative_assessment	NINA	Jan_Ove_Gjershaug	jan.o.gjershaug@nina.no	1	1	1	1	1	Yes	0	100	0	0	0	0	0	0	0	100	RL	Bird	Vertebrate	NT	Yes	no	TP	2	TP_spe	0	0	0	0	0	0	0	0	0	0	0	0	0	Pristine	LOW	1
freshwater	fossekall	Cinclus_cinclus	dipper	percentage_of_the_reference	expert_relative_assessment	NINA	Jan_Ove_Gjershaug	jan.o.gjershaug@nina.no	1	1	1	1	1	No	0	75	25	0	0	0	0	0	0	75	L	Bird	Vertebrate	LC	Yes	no	IC	2	IC_spe	0	0	0	0	0	0	0	0	0	0	0	0	0	Pristine	LOW	NA
freshwater	horndykker	Podiceps_auritus	black-headed_gull	percentage_of_the_reference	expert_relative_assessment	NINA	Jan_Ove_Gjershaug	jan.o.gjershaug@nina.no	1	1	1	1	1	Yes	0	100	0	0	0	0	0	0	0	100	L	Bird	Vertebrate	EN	Yes	no	IC	3	IC_gen	0	1	0	0	0	0	0	0	1	0	1	0	0	Pristine	LOW	NA
freshwater	sangsvane	Cygnus_cygnus	Whooper_swan	percentage_of_the_reference	expert_relative_assessment	NINA	Jan_Ove_Gjershaug	jan.o.gjershaug@nina.no	1	1	1	1	1	Yes	0	100	0	0	0	0	0	0	0	100	L	Bird	Vertebrate	NT	Yes	no	H	4	PCF	0	1	0	0	0	0	0	0	1	0	0	0	0	Pristine	LOW	NA
freshwater	smalom	Gavia_stellata	red-throated_loon	percentage_of_the_reference	expert_relative_assessment	NINA	Jan_Ove_Gjershaug	jan.o.gjershaug@nina.no	1	1	1	1	1	Yes	0	100	0	0	0	0	0	0	0	100	L	Bird	Vertebrate	LC	Yes	no	IC	3	IC_gen	0	1	0	0	0	0	0	0	0	0	0	0	0	Pristine	LOW	NA
freshwater	sothone	Fulica_atra	eurasian_coot	percentage_of_the_reference	expert_relative_assessment	NINA	Jan_Ove_Gjershaug	jan.o.gjershaug@nina.no	1	1	1	1	1	Yes	0	100	0	0	0	0	0	0	0	100	L	Bird	Vertebrate	LC	Yes	no	IC	3	IC_gen	0	1	0	0	1	0	0	0	0	0	0	0	0	Pristine	LOW	NA
freshwater	storlom	Gavia_arctica	black-throated_loon	percentage_of_the_reference	expert_relative_assessment	NINA	Jan_Ove_Gjershaug	jan.o.gjershaug@nina.no	1	1	1	1	1	Yes	0	100	0	0	0	0	0	0	0	100	L	Bird	Vertebrate	VU	Yes	no	IC	3	IC_gen	0	0	0	0	0	0	1	0	0	0	1	0	0	Pristine	LOW	NA
freshwater	strandsnipe	Actitis_hypoleuca	common_sandpiper	percentage_of_the_reference	expert_relative_assessment	NINA	Jan_Ove_Gjershaug	jan.o.gjershaug@nina.no	1	1	1	1	1	Yes	0	100	0	0	0	0	0	0	0	100	L	Bird	Vertebrate	LC	Yes	no	IC	4	IC_gen	0	1	0	0	0	0	0	0	0	0	0	0	0	Pristine	LOW	NA
freshwater	toppand	Aythya_fuligula	tufted_duck	percentage_of_the_reference	expert_relative_assessment	NINA	Jan_Ove_Gjershaug	jan.o.gjershaug@nina.no	1	1	1	1	1	Yes	0	100	0	0	0	0	0	0	0	100	L	Bird	Vertebrate	LC	Yes	no	IC	4	IC_gen	0	1	0	0	0	0	1	0	1	0	0	0	0	Pristine	LOW	NA
freshwater	Stokkand	Anas_platyrhynchos	mallard	percentage_of_the_reference	expert_relative_assessment	NINA	Jan_Ove_Gjershaug	jan.o.gjershaug@nina.no	1	1	1	1	1	Yes	0	100	0	0	0	0	0	0	0	100	L	Bird	Vertebrate	LC	Yes	no	H	4	PCF	0	1	0	0	1	0	0	0	0	0	0	0	0	Pristine	LOW	NA
mountain	fjellfiltmose	Aulacomnium_turgidum	Moss	Geographical_extent	area_coverage_occurence	VM/rødliste	Kristian_Hassel	kristian.hassel@vm.ntnu.no	1	0	1	1	1	Yes	0	0	0	0	100	0	0	0	0	100	NA	Bryophyta	Plant	NA	No	No	PP	2	PP_spe	0	0	1	0	0	0	0	0	0	0	0	0	0	past_knowledge	LOW	NA
mountain	fjellrev	Vulpes_lagopus	Arctic_Fox	reproductive_unit	population_size_density_biomass	NINA	Nina_Eide	nina.eide@nina.no	1	0	0	1	1	Yes	0	0	0	0	100	0	0	0	0	100	NA	Mammals	Vertebrate	CR	No	Yes	TP	2	TP_spe	1	1	1	1	1	0	0	0	0	0	1	0	0	Carrying_capacity	OPT	1
mountain	fjellrype	Lagopus_mutus	rock_ptarmigan	density	population_size_density_biomass	NINA	Hans_C_Pedersen	hans.pedersen@nina.no	1	1	1	1	1	Yes	0	0	0	0	100	0	0	0	0	100	NA	Bird	Vertebrate	LC	No	no	H	3	PCF	0	0	1	0	0	1	0	0	0	0	0	0	0	Carrying_capacity	LOW	NA
mountain	fjellvalmue	Papaver_radicatum	Arctic_Poppy	area	area_coverage_occurence	NINA	Odd_Stabbetorp/Olav_Skarpaas/Ander_Often	olav.skarpaas@nina.no	1	0	1	1	1	Yes	0	0	0	0	100	0	0	0	0	100	NA	Angiosperma	Plant	NA	No	No	PP	1	PP_spe	0	0	1	0	0	0	0	0	0	1	0	0	0	Pristine	LOW	NA
mountain	greplyng	Loiseleuria_procumbens	Alpine_Azalea	area	area_coverage_occurence	NINA	Odd_Stabbetorp/Olav_Skarpaas/Ander_Often	olav.skarpaas@nina.no	1	1	1	1	1	Yes	0	0	0	0	100	0	0	0	0	100	NA	Angiosperma	Plant	NA	No	No	PP	2	PP_spe	0	0	1	0	0	0	0	0	0	0	0	1	0	Pristine	LOW	NA
mountain	issoleie	Beckwithia_glacialis	Glacier_Crowfoot_	area	area_coverage_occurence	NINA	Odd_Stabbetorp/Olav_Skarpaas/Ander_Often	olav.skarpaas@nina.no	1	0	1	1	1	Yes	0	0	0	0	100	0	0	0	0	100	NA	Angiosperma	Plant	NT	No	No	PP	1	PP_spe	0	0	1	0	0	0	0	0	0	0	0	1	0	Pristine	LOW	NA
mountain	jaktfalk	Falco_rusticolus	Gyrfalcon	percentage_of_the_reference	expert_relative_assessment	NINA	Jan_Ove_Gjershaug	jan.o.gjershaug@nina.no	1	1	1	1	1	Yes	0	0	0	0	100	0	0	0	0	100	NA	Bird	Vertebrate	NT	Yes	no	TP	1	TP_spe	0	0	0	0	0	1	0	0	0	0	0	0	0	Pristine	LOW	1
mountain	jerv	Gulo_gulo	Wolverine	reproductive_unit	population_size_density_biomass	NINA	Henrik_Brøseth	Henrik.Brøseth@nina.no	1	1	1	1	1	No	0	0	0	25	75	0	0	0	0	75	NA	Mammals	Vertebrate	EN	Yes	Yes	TP	3	TP_gen	1	1	0	0	0	1	0	0	0	0	1	1	0	Carrying_capacity	OPT	1
mountain	nipdraugmose	Anastrophyllum_joergensenii	Moss	Geographical_extent	area_coverage_occurence	VM/rødliste	Kristian_Hassel	kristian.hassel@vm.ntnu.no	0	0	1	0	0	Yes	0	0	0	0	100	0	0	0	0	100	NA	Bryophyta	Plant	EN	No	No	PP	1	PP_spe	0	0	1	0	0	0	0	0	0	0	1	0	0	past_knowledge	LOW	NA
mountain	praktdraugmose	Anastrophyllum_donnianum	Moss	Geographical_extent	area_coverage_occurence	VM/rødliste	Kristian_Hassel	kristian.hassel@vm.ntnu.no	0	0	1	1	0	Yes	0	0	0	0	100	0	0	0	0	100	NA	Bryophyta	Plant	NT	No	No	PP	1	PP_spe	0	0	1	0	0	0	0	0	0	0	0	0	0	past_knowledge	LOW	NA
mountain	reinbeitelav	Cladonia__&_Cetraria_spp.	Reindeer_forage_lichens	area	area_coverage_occurence	NINA	Jarle_W._Bjerke	jarle.werner.bjerke@nina.no	1	1	1	1	1	Yes	0	0	0	0	100	0	0	0	0	100	NA	Lichens	Fungi	LC	Yes	Yes	Mi	2	PP_spe	1	0	1	1	0	0	0	0	0	0	0	1	1	Pristine	LOW	NA
mountain	sylmose	Atractylocarpus_alpinus	Moss	Geographical_extent	area_coverage_occurence	VM/rødliste	Kristian_Hassel	kristian.hassel@vm.ntnu.no	0	0	1	0	0	Yes	0	0	0	0	100	0	0	0	0	100	NA	Bryophyta	Plant	EN	No	No	PP	1	PP_spe	0	0	1	0	0	0	0	0	0	0	1	0	0	past_knowledge	LOW	NA
mountain	torntvebladmose	Scapania_nimbosa	Moss	Geographical_extent	area_coverage_occurence	VM/rødliste	Kristian_Hassel	kristian.hassel@vm.ntnu.no	0	0	0	1	0	Yes	0	0	0	0	100	0	0	0	0	100	NA	Bryophyta	Plant	CR	No	No	PP	1	PP_spe	0	0	1	0	0	0	0	0	0	0	1	0	0	past_knowledge	LOW	NA
mountain	vierkratt_areal	Salix_sp._area	Willow_shrub	area	area_coverage_occurence	NINA	Jarle_W._Bjerke	jarle.werner.bjerke@nina.no	1	1	1	1	1	Yes	0	0	0	0	100	0	0	0	0	100	NA	Angiosperma	Plant	NA	No	No	PP	4	Ext	1	0	1	0	0	0	0	0	0	0	0	1	1	Pristine	LOW	NA
mountain	villrein	Rangifer_tarandus	wild_reindeer	density	population_size_density_biomass	NINA	Olav_Strand	Olav.Strand@nina.no	1	1	1	1	1	Yes	0	0	0	0	100	0	0	0	0	100	NA	Mammals	Vertebrate	NA	NA	NA	H	3	Ext	1	1	0	0	0	1	0	0	0	0	0	0	0	Carrying_capacity	OPT	NA
mountain	bergand	Aythya_marila	greater_scoup	percentage_of_the_reference	expert_relative_assessment	NINA	Jan_Ove_Gjershaug	jan.o.gjershaug@nina.no	1	1	1	1	1	Yes	0	0	0	0	100	0	0	0	0	100	NA	Bird	Vertebrate	VU	Yes	no	IC	4	IC_gen	0	1	0	0	0	0	1	0	0	0	1	0	0	Pristine	LOW	NA
mountain	boltit	Charadrius_morinellus	eurasian_dotterel	percentage_of_the_reference	expert_relative_assessment	NINA	Jan_Ove_Gjershaug	jan.o.gjershaug@nina.no	1	1	1	1	1	Yes	0	0	0	0	100	0	0	0	0	100	NA	Bird	Vertebrate	LC	Yes	no	IC	3	IC_gen	0	0	0	0	0	0	0	0	0	0	0	0	0	Pristine	LOW	NA
mountain	fjaereplytt	Calidris_maritima	purple_sandpiper	percentage_of_the_reference	expert_relative_assessment	NINA	Jan_Ove_Gjershaug	jan.o.gjershaug@nina.no	1	1	1	1	1	Yes	0	0	0	0	100	0	0	0	0	100	NA	Bird	Vertebrate	LC	Yes	no	IC	4	IC_gen	0	0	0	0	0	0	0	0	0	0	0	0	0	Pristine	LOW	NA
mountain	fjellerke	Eremophila_alpestris	shore_lark	percentage_of_the_reference	expert_relative_assessment	NINA	Jan_Ove_Gjershaug	jan.o.gjershaug@nina.no	1	1	1	1	1	Yes	0	0	0	0	100	0	0	0	0	100	NA	Bird	Vertebrate	NT	Yes	no	IC	3	IC_gen	0	0	0	0	0	0	0	0	0	0	0	0	0	Pristine	LOW	NA
mountain	fjellvak	Buteo_lagopus	Rough-legged_Buzzard	percentage_of_the_reference	expert_relative_assessment	NINA	Jan_Ove_Gjershaug	jan.o.gjershaug@nina.no	1	1	1	1	1	No	0	0	0	20	80	0	0	0	0	80	NA	Bird	Vertebrate	NT	Yes	no	TP	4	TP_gen	0	0	0	0	0	0	0	0	0	0	0	0	0	Pristine	LOW	1
mountain	havelle	Clangula_hyemalis	long-tailed_duck	percentage_of_the_reference	expert_relative_assessment	NINA	Jan_Ove_Gjershaug	jan.o.gjershaug@nina.no	1	1	1	1	1	Yes	0	0	0	0	100	0	0	0	0	100	NA	Bird	Vertebrate	LC	Yes	no	IC	2	IC_spe	0	0	0	0	0	0	1	0	0	0	0	0	0	Pristine	LOW	NA
mountain	heilo	Pluvialis_apricaria	eurasian_golden_plover	percentage_of_the_reference	expert_relative_assessment	NINA	Jan_Ove_Gjershaug	jan.o.gjershaug@nina.no	1	1	1	1	1	No	25	0	25	0	50	0	0	0	0	50	NA	Bird	Vertebrate	LC	Yes	no	IC	3	IC_gen	0	0	0	0	0	0	0	0	0	0	0	0	0	Pristine	LOW	NA
mountain	heipiplerke	Anthus_pratensis	NA	percentage_of_the_reference	expert_relative_assessment	NINA	Jan_Ove_Gjershaug	jan.o.gjershaug@nina.no	1	1	1	1	1	Yes	0	0	0	0	100	0	0	0	0	100	NA	Bird	Vertebrate	LC	Yes	no	IC	3	IC_gen	0	0	0	0	0	0	0	0	0	0	0	0	0	Pristine	LOW	NA
mountain	lappspurv	Calcarius_lapponicus	lapland_longspur	percentage_of_the_reference	expert_relative_assessment	NINA	Jan_Ove_Gjershaug	jan.o.gjershaug@nina.no	1	1	1	1	1	Yes	0	0	0	0	100	0	0	0	0	100	NA	Bird	Vertebrate	LC	Yes	no	IC	3	IC_gen	0	0	0	0	0	0	0	0	0	0	0	0	0	Pristine	LOW	NA
mountain	snospurv	Plectrophenax_nivalis	snow_bunting	percentage_of_the_reference	expert_relative_assessment	NINA	Jan_Ove_Gjershaug	jan.o.gjershaug@nina.no	1	1	1	1	1	Yes	0	0	0	0	100	0	0	0	0	100	NA	Bird	Vertebrate	LC	Yes	no	IC	3	IC_gen	0	0	0	0	0	0	0	0	0	0	0	0	0	Pristine	LOW	NA
mountain	steinskvett	Oenanthe_oenanthe	northern_wheatear	percentage_of_the_reference	expert_relative_assessment	NINA	Jan_Ove_Gjershaug	jan.o.gjershaug@nina.no	1	1	1	1	1	No	20	0	0	0	80	0	0	0	0	80	NA	Bird	Vertebrate	NT	Yes	no	IC	3	IC_gen	0	0	0	0	0	0	0	0	0	0	0	0	0	Pristine	LOW	NA
mountain	smågnagere	NA	small_rodents	density	population_size_density_biomass	NINA	Erik_Framstad	Erik.Framstad@nina.no	1	1	1	1	1	No	0	0	0	25	75	0	0	0	0	75	NA	Mammals	Vertebrate	NA	No	no	H	3	Ext	1	0	1	0	0	0	0	0	0	0	0	1	0	Pristine	LOW	NA
ocean_pelagic	blakveite	Reinhardtius_hippoglossoides	Greenland_halibut	biomass	population_size_density_biomass	Havforskningsinst	Elvar_H._Alfredsson	elvarh@imr.no	0	0	0	1	1	No	0	0	0	0	0	0	0	40	60	60	NA	Actinopterygian	Vertebrate	na	Yes	no	TP	3	TP_gen	0	0	0	1	0	1	0	0	0	0	0	0	0	past_knowledge	LOW	NA
ocean_pelagic	dyreplankton_biomasse	NA	Zooplankton	biomass	population_size_density_biomass	Havforskningsinst	Webjørn_Welle,_Tone_falkenhaug,_Tor_Knutsen	tor.knutsen@imr.no	1	1	1	1	1	Yes	0	0	0	0	0	0	0	100	0	100	NA	Crustaceans	Invertebrate	na	No	Yes	H	2	Ext	0	0	1	1	0	0	0	0	0	1	0	1	1	Pristine	LOW	NA
ocean_pelagic	finnhval	Balaenoptera_physalus	Fin_whale	population_size	population_size_density_biomass	Havforskningsinst	Nils_Øien	nils.oien@imr.no	0	0	0	1	1	Yes	0	0	0	0	0	0	0	100	0	100	NA	Mammals	Vertebrate	LC	Yes	no	Mu	2	IC_spe	0	0	0	1	0	0	0	0	0	0	0	0	0	past_knowledge	OPT	NA
ocean_pelagic	gronlandssel	Phoca_groenlandica	Harp_seal	breeding_success	demographic_parameter	Havforskningsinst	Tor_Arne_Øigård	tor.arne.oeigaard@imr.no	0	0	0	1	1	Yes	0	0	0	0	0	0	0	100	0	100	NA	Mammals	Vertebrate	na	Yes	no	TP	3	TP_gen	0	0	1	1	0	1	0	0	0	0	0	0	0	Traditional_management	OPT	NA
ocean_pelagic	klappmyss	Cystophora_cristata	Hooded_seal	breeding_success	demographic_parameter	Havforskningsinst	Tor_Arne_Øigård	tor.arne.oeigaard@imr.no	0	0	0	1	0	No	0	0	0	0	0	0	0	80	20	80	NA	Mammals	Vertebrate	VU	Yes	no	TP	2	TP_spe	0	0	1	1	0	1	0	0	0	0	1	0	0	Traditional_management	OPT	NA
ocean_pelagic	knolhval	Megaptera_novaeangliae	Humpback_whale	population_size	population_size_density_biomass	Havforskningsinst	Nils_Øien	nils.oien@imr.no	1	1	1	1	1	Yes	0	0	0	0	0	0	0	100	0	100	NA	Mammals	Vertebrate	LC	Yes	no	Mu	2	IC_gen	0	0	0	1	0	0	0	0	0	0	0	0	0	past_knowledge	OPT	NA
ocean_pelagic	kolmule	Micromesistius_poutassou	Blue_whiting	biomass	population_size_density_biomass	Havforskningsinst	Åge_Høines	aage.hoines@imr.no	0	0	0	1	1	Yes	0	0	0	0	0	0	0	100	0	100	NA	Actinopterygian	Vertebrate	na	Yes	no	Mu	3	IC_gen	0	0	0	1	0	1	0	0	0	0	0	0	0	Precautionary_level	LOW	NA
ocean_pelagic	lodde	Mallotus_villosus	Capelin	biomass	population_size_density_biomass	Havforskningsinst	Sigurd_Tjelmeland	sigurd.tjelmeland@imr.no	0	0	0	1	1	Yes	0	0	0	0	0	0	0	100	0	100	NA	Actinopterygian	Vertebrate	na	Yes	no	IC	2	Ext	0	0	1	1	0	1	0	0	0	0	0	1	0	Pristine	LOW	NA
ocean_pelagic	lysing	Merluccius_merluccius	European_Hake	relative_rank	expert_relative_assessment	Havforskningsinst	Otte_Bjelland	otte.bjelland@imr.no	1	1	1	1	1	No	0	0	0	0	0	10	5	70	15	70	NA	Actinopterygian	Vertebrate	na	Yes	no	IC	2	IC_spe	0	0	1	1	0	1	0	0	0	0	0	0	0	Carrying_capacity	LOW	NA
ocean_pelagic	makrell	Scomber_scombrus	Mackerel	biomass	population_size_density_biomass	Havforskningsinst	Leif_Nøttestad	leif.nøttestad@imr.no	1	1	1	1	0	No	0	0	0	0	0	20	0	80	0	80	NA	Actinopterygian	Vertebrate	na	Yes	no	IC	2	IC_spe	0	0	1	1	0	0	0	0	0	0	0	0	0	Precautionary_level	LOW	NA
ocean_pelagic	Plantplankton_(Chl_a)	NA	Phytoplankton	concentration	population_size_density_biomass	Havforskningsinst	Lars-Johan_Naustvold	lars.johan.naustvoll@imr.no	1	1	1	1	1	Yes	0	0	0	0	0	0	0	100	0	100	NA	Algae	Plant	na	No	Yes	PP	NA	Ext	0	0	1	0	0	0	0	0	1	0	0	0	1	past_knowledge	OPT	NA
ocean_pelagic	polartorsk	Boreogadus_saida	Polar_cod	percentage_of_the_reference	expert_relative_assessment	Havforskningsinst	Sigurd_Tjelmeland	sigurd.tjelmeland@imr.no	0	0	0	0	1	No	0	0	0	0	0	0	0	60	40	60	NA	Actinopterygian	Vertebrate	CR	No	no	IC	2	IC_spe	0	0	1	1	0	1	0	0	0	0	1	0	0	past_knowledge	LOW	NA
ocean_pelagic	rognkjeks__rognkall	Cyclopterus_lumpus	Lumpfish	percentage_of_the_reference	expert_relative_assessment	Havforskningsinst	Knut_Sunnanå	knut.sunnanaa@imr.no	1	1	1	1	1	No	0	0	0	0	0	0	0	100	0	100	NA	Actinopterygian	Vertebrate	na	Yes	no	TP	2	TP_spe	0	0	0	1	0	1	0	0	0	0	0	0	0	Traditional_management	LOW	NA
ocean_pelagic	sei	Pollachius_virens	Saithe	biomass	population_size_density_biomass	Havforskningsinst	Tore_Jakobsen,_Sigbjørn_Mehl	tore.jakobsen@imr.no	1	1	1	1	1	No	0	0	0	0	0	40	0	60	0	60	NA	Actinopterygian	Vertebrate	na	Yes	no	Mu	2	IC_spe	0	0	1	1	0	1	0	0	0	0	0	0	0	Precautionary_level	LOW	NA
ocean_pelagic	Spermhval	Physeter_macrocephalus	sperm_whale	population_size	population_size_density_biomass	Havforskningsinst	Nils_Øien	nils.oien@imr.no	0	0	0	1	0	Yes	0	0	0	0	0	0	0	100	0	100	NA	Mammals	Vertebrate	na	Yes	no	TP	2	TP_spe	0	0	0	1	0	0	0	0	0	0	0	0	0	past_knowledge	OPT	NA
ocean_pelagic	sild	Clupea_harengus	Herring	biomass	population_size_density_biomass	Havforskningsinst	Cecilie_Kvamme,_Erling_Kåre_Stenevik	erling.kaare.stenevik@imr.no	1	1	1	1	1	Yes	0	0	0	0	0	0	0	100	0	100	NA	Actinopterygian	Vertebrate	na	Yes	no	IC	2	Ext	0	0	1	1	0	1	0	0	0	0	0	1	0	Precautionary_level	LOW	NA
ocean_pelagic	taggmakrell	Trachurus_trachurus	Atlantic_horse_mackerel	relative_rank	expert_relative_assessment	Havforskningsinst	leif_Nøttestad	leif.nottestad@imr.no	0	0	1	1	0	No	0	0	0	0	0	20	0	80	0	80	NA	Actinopterygian	Vertebrate	na	Yes	no	IC	2	IC_spe	0	0	1	1	0	1	0	0	0	0	0	0	0	Precautionary_level	LOW	NA
ocean_pelagic	tobis	Ammodytes_sp.	Sand_eel	biomass	population_size_density_biomass	Havforskningsinst	Tore_Johannesen	tore.Johannesen@imr.no	1	1	1	1	0	No	0	0	0	0	0	0	0	20	80	80	NA	Actinopterygian	Vertebrate	na	Yes	no	Mu	2	IC_spe	0	0	1	1	0	1	0	0	0	0	0	1	0	Precautionary_level	LOW	NA
ocean_pelagic	vagehval	Balaenoptera_acutorostrata	Minke_whale	population_size	population_size_density_biomass	Havforskningsinst	Nils_Øien	nils.oien@imr.no	0	0	1	1	1	Yes	0	0	0	0	0	0	0	100	0	100	NA	Mammals	Vertebrate	na	Yes	no	Mu	2	IC_gen	0	0	0	1	0	1	0	0	0	0	0	0	0	past_knowledge	OPT	NA
ocean_pelagic	vassild	Argentina_silus	Silver_smelt	relative_rank	expert_relative_assessment	Havforskningsinst	Kristin_Helle	kristin.helle@imr.no	1	1	1	1	0	Yes	0	0	0	0	0	0	0	100	0	100	NA	Actinopterygian	Vertebrate	na	Yes	no	IC	3	IC_gen	0	0	0	1	0	1	0	0	0	0	0	0	0	past_knowledge	LOW	NA
ocean_pelagic	brugde	Cetorhinus_maximus	Basking_shark	percentage_of_the_reference	expert_relative_assessment	Havforskningsinst	Tove_Vollen	tove.vollen@imr.no	1	1	1	1	0	Yes	0	0	0	0	0	0	0	100	0	100	NA	Chondrychtian	Vertebrate	na	Yes	no	TP	1	TP_spe	0	0	0	1	0	1	0	0	0	0	0	0	0	past_knowledge	LOW	NA
ocean_pelagic	habrann	Lamna_nasus	Porbeagle	percentage_of_the_reference	expert_relative_assessment	Havforskningsinst	Tove_Vollen	tove.vollen@imr.no	1	1	1	1	0	Yes	0	0	0	0	0	0	0	100	0	100	NA	Chondrychtian	Vertebrate	VU	Yes	no	TP	3	TP_gen	0	0	0	1	0	1	0	0	0	0	1	0	0	past_knowledge	LOW	NA
ocean_pelagic	Krill	Meganyctiphanes_norvegica	Krill	relative_rank	expert_relative_assessment	Havforskningsinst	Elena_Eriksen	elena.eriksen@imr.no	1	1	1	1	1	Yes	0	0	0	0	0	0	0	100	0	100	NA	Crustaceans	Invertebrate	na	No	Yes	Mu	2	Ext	0	0	0	1	0	0	0	0	0	0	0	1	0	past_knowledge	OPT	NA
ocean_pelagic	brisling	Sprattus_sprattus	Sprat	percentage_of_the_reference	expert_relative_assessment	Havforskningsinst	Cecilie_Kvamme	cecilie.kvamme@imr.no	1	1	1	1	0	No	0	0	0	0	0	0	0	100	0	100	NA	Actinopterygian	Vertebrate	NT	Yes	no	IC	2	Ext	0	0	0	1	0	1	0	0	0	0	0	0	0	past_knowledge	LOW	NA
ocean_bottom	blalange	Molva_dypterygia	Blue_ling	percentage_of_the_reference	expert_relative_assessment	Havforskningsinst	Kristin_Helle	kristin.helle@imr.no	0	0	1	1	1	Yes	0	0	0	0	0	0	0	0	100	100	NA	Actinopterygian	Vertebrate	VU	Yes	no	TP	2	TP_spe	0	0	0	1	0	1	0	0	0	0	1	0	0	Traditional_management	LOW	NA
ocean_bottom	blasteinbit	Anarhichas_denticulatus	Northern_wolffish	percentage_of_the_reference	expert_relative_assessment	Havforskningsinst	Edda_johannesen	edda.johannsesen@imr.no	0	0	0	1	1	No	0	0	0	0	0	0	0	15	85	85	NA	Actinopterygian	Vertebrate	na	No	no	TP	3	TP_gen	0	0	0	1	0	1	0	0	0	0	0	0	0	past_knowledge	LOW	NA
ocean_bottom	blotbunn_artsmangfold_fauna	NA	index_of_benthic_fauna_species	Shannon_index	Theoric_index_previously_developped	NIVA/HI	Eivind_Oug	eivind.oug@niva.no	1	1	1	1	1	Yes	0	0	0	0	0	0	0	0	100	100	NA	NA	Invertebrate	na	No	Yes	Mu	NA	Ext	0	0	1	1	0	0	0	0	1	0	0	0	1	Traditional_management	LOW	NA
ocean_bottom	breiflabb	Lophus_piscatorius	Angler_fish	relative_rank	expert_relative_assessment	Havforskningsinst	Otte_Bjelland	otte.bjelland@imr.no	1	1	1	1	1	No	0	0	0	0	0	0	50	0	50	50	NA	Actinopterygian	Vertebrate	na	Yes	no	TP	3	TP_gen	0	0	0	1	0	1	0	0	0	0	0	0	0	Carrying_capacity	LOW	NA
ocean_bottom	brosme	Brosme_brosme	Tusk	percentage_of_the_reference	expert_relative_assessment	Havforskningsinst	Kristin_Helle	kristin.helle@imr.no	1	1	1	1	1	No	0	0	0	0	0	0	20	0	80	80	NA	Actinopterygian	Vertebrate	na	Yes	no	TP	2	TP_spe	0	0	0	1	0	1	0	0	0	0	0	0	0	Traditional_management	LOW	NA
ocean_bottom	flekksteinbit	Anarhichas_minor	Spotted_wolffish	percentage_of_the_reference	expert_relative_assessment	Havforskningsinst	Edda_johannesen	edda.johannsesen@imr.no	0	0	1	1	1	Yes	0	0	0	0	0	0	0	0	100	100	NA	Actinopterygian	Vertebrate	na	Yes	no	TP	3	TP_gen	0	0	0	1	0	1	0	0	0	0	0	0	0	past_knowledge	LOW	NA
ocean_bottom	grasteinbit	Anarhichas_lupus	Wolffish	percentage_of_the_reference	expert_relative_assessment	Havforskningsinst	Edda_johannesen	edda.johannsesen@imr.no	1	1	1	1	1	No	0	0	0	0	0	0	70	0	30	70	NA	Actinopterygian	Vertebrate	na	Yes	no	TP	3	TP_gen	0	0	0	1	0	1	0	0	0	0	0	0	0	past_knowledge	LOW	NA
ocean_bottom	haneskjell	Clamys_islandica	Iceland_scallop	percentage_of_the_reference	expert_relative_assessment	Havforskningsinst	Lis_Lindahl_Jørgensen	lis.lindal.joergensen@imr.no	0	0	0	0	1	No	0	0	0	0	0	0	0	0	100	100	NA	Mollusc	Invertebrate	na	Yes	no	Fi	2	PCF	0	0	1	1	0	1	0	0	0	0	0	0	0	past_knowledge	OPT	NA
ocean_bottom	hvitting	Merlangius_merlangus	Whiting	biomass	population_size_density_biomass	Havforskningsinst	Tore_Jakobsen	tore.jakobsen@imr.no	1	1	1	0	0	No	0	0	0	0	0	0	40	0	60	60	NA	Actinopterygian	Vertebrate	na	Yes	no	Mu	3	IC_gen	0	0	1	1	0	1	0	0	0	0	0	0	0	Precautionary_level	LOW	NA
ocean_bottom	hyse	Melanogrammus_aeglefinus	Haddock	biomass	population_size_density_biomass	Havforskningsinst	Tore_Jakobsen	tore.jakobsen@imr.no	1	1	1	1	1	Yes	0	0	0	0	0	0	0	0	100	100	NA	Actinopterygian	Vertebrate	LC	Yes	no	TP	3	TP_gen	0	0	0	1	0	1	0	0	0	0	0	0	0	Precautionary_level	LOW	NA
ocean_bottom	korallrev	Lophelia_pertusa	Northern_coral_reef	percentage_of_the_reference	expert_relative_assessment	Havforskningsinst	Jan_Helge_Fosså	jan.helge.fossaa@imr.no	1	1	1	1	1	Yes	0	0	0	0	0	0	0	0	100	100	NA	Cnidaria	Invertebrate	NA	No	no	Fi	2	IC_gen	0	1	1	0	0	0	0	0	0	1	0	1	0	Pristine	OPT	NA
ocean_bottom	kveite	Hippoglossus_hippoglossus_	Atlantic_halibut	percentage_of_the_reference	expert_relative_assessment	Havforskningsinst	Kristin_Helle	kristin.helle@imr.no	1	1	1	1	1	No	0	0	0	0	0	0	0	70	30	70	NA	Actinopterygian	Vertebrate	NT	Yes	no	TP	4	TP_gen	0	0	1	1	0	1	0	0	0	0	0	0	0	past_knowledge	LOW	NA
ocean_bottom	lange	Molva_molva	Ling	percentage_of_the_reference	expert_relative_assessment	Havforskningsinst	Kristin_Helle	kristin.helle@imr.no	1	1	1	1	1	No	0	0	0	0	0	0	20	0	80	80	NA	Actinopterygian	Vertebrate	NT	Yes	no	Mu	3	TP_gen	0	0	0	1	0	1	0	0	0	0	0	0	0	past_knowledge	LOW	NA
ocean_bottom	oyepal	Trispoterus_esmarkii	Norway_pout	biomass	population_size_density_biomass	Havforskningsinst	Tore_Johannesen	tore.Johannesen@imr.no	1	1	1	1	1	No	0	0	0	0	0	0	0	20	80	80	NA	Actinopterygian	Vertebrate	NT	Yes	no	Mu	2	IC_spe	0	0	0	1	0	1	0	0	0	0	0	0	0	Precautionary_level	LOW	NA
ocean_bottom	reker_hav	Pandalus_borealis	Northern_deep_sea_shrimp	CPUE	fisheries_statistics	Havforskningsinst	Guldborg_Søvik/Trond_Thangstad	Guldborg.sovik@imr.no	1	1	1	1	1	No	0	0	0	0	0	0	0	30	70	70	NA	Crustaceans	Invertebrate	na	Yes	no	Mu	4	Ext	0	0	1	1	0	1	0	0	0	0	0	1	0	Carrying_capacity	OPT	NA
ocean_bottom	rodspette	Pleuronectes_platessa	Plaice	biomass	population_size_density_biomass	Havforskningsinst	Tore_Jakobsen	tore.jakobsen@imr.no	1	1	1	0	0	Yes	0	0	0	0	0	0	0	0	100	100	NA	Actinopterygian	Vertebrate	na	Yes	No	Mu	2	IC_spe	0	0	0	1	0	1	0	0	0	0	0	0	0	Precautionary_level	LOW	NA
ocean_bottom	sjokreps	Nephrops_norvegicus	Norway_lobster	CPUE	fisheries_statistics	Havforskningsinst	Guldborg_Søvik	guldborg.soevik@imr.no_	1	1	1	1	0	Yes	0	0	0	0	0	0	25	0	75	75	NA	Crustaceans	Invertebrate	na	Yes	no	Mu	3	IC_gen	0	0	1	0	0	1	0	0	0	0	0	0	0	Carrying_capacity	LOW	NA
ocean_bottom	snabeluer	Sebastes_mentella	Deep_sea_redfish	percentage_of_the_reference	expert_relative_assessment	Havforskningsinst	Benjamin_Planque	benjamin.planque@imr.no	0	0	0	1	1	No	0	0	0	0	0	0	0	75	25	75	NA	Actinopterygian	Vertebrate	VU	Yes	no	Mu	2	IC_spe	0	0	0	1	0	1	0	0	0	0	1	0	0	past_knowledge	LOW	NA
ocean_bottom	svamp	Spongiformes	Sponges	percentage_of_the_reference	expert_relative_assessment	Havforskningsinst	Raymond_Bannister	raymond.bannister@imr.no	1	1	1	1	1	Yes	0	0	0	0	0	0	0	0	100	100	NA	Porifera	Invertebrate	na	No	no	Fi	2	Ext	0	1	1	0	0	0	0	0	0	1	0	1	1	Pristine	OPT	NA
ocean_bottom	torsk	Gadus_morhua	Atlantic_cod	biomass	population_size_density_biomass	Havforskningsinst	Asgeir_Aglen	asgeir.aglen@imr.no	1	1	1	1	0	No	0	0	0	0	0	0	0	40	60	60	NA	Actinopterygian	Vertebrate	na	Yes	no	TP	3	Ext	0	0	1	1	0	1	0	0	0	0	0	1	0	Precautionary_level	LOW	NA
ocean_bottom	uer	Sebastes_marinus	Golden_redfish_=Ocean_perch	percentage_of_the_reference	expert_relative_assessment	Havforskningsinst	Benjamin_Planque	benjamin.planque@imr.no	0	0	1	1	1	No	0	0	0	0	0	0	0	75	25	75	NA	Actinopterygian	Vertebrate	VU	Yes	no	Mu	2	IC_spe	0	0	1	1	0	1	0	0	0	0	1	0	0	past_knowledge	LOW	NA
ocean_bottom	isgalte	Macrourus_berglax	Onion-eye_grenadier	percentage_of_the_reference	expert_relative_assessment	Havforskningsinst	Hege_Øverbø_Hansen	hege.oeverboe.hansen@imr.no	0	0	0	1	0	Yes	0	0	0	0	0	0	0	0	100	100	NA	Actinopterygian	Vertebrate	na	Yes	no	TP	2	TP_spe	0	0	0	1	0	1	0	0	0	0	0	0	0	Traditional_management	LOW	NA
ocean_bottom	skolest	Coryphaenoides_rupestris	Roundnose_grenadier	biomass	population_size_density_biomass	Havforskningsinst	Hege_Øverbø_Hansen	hege.oeverboe.hansen@imr.no	1	1	1	0	0	Yes	0	0	0	0	0	0	0	0	100	100	NA	Actinopterygian	Vertebrate	na	Yes	no	TP	1	TP_spe	0	0	0	1	0	1	0	0	0	0	0	0	0	past_knowledge	LOW	NA
ocean_bottom	skater	NA	Rays,_skates	percentage_of_the_reference	expert_relative_assessment	Havforskningsinst	Tove_Vollen	tove.vollen@imr.no	1	1	1	1	1	No	0	0	0	0	0	0	50	0	50	50	NA	Chondrychtian	Vertebrate	NA	Yes	no	TP	4	TP_gen	0	1	0	0	0	1	0	0	0	0	0	0	1	Traditional_management	LOW	NA
coast_bottom	al	Anguilla_anguilla	European_Eel	fishing_landing_statistic	fisheries_statistics	Havforskningsinst	Jakob_Gjøsæter	jakob.gjoesaeter@imr.no	1	1	1	1	0	No	0	25	0	0	0	0	75	0	0	75	NA	Actinopterygian	Vertebrate	CR	Yes	no	IC	3	IC_gen	0	0	0	1	0	1	0	0	0	0	1	0	0	Pristine	LOW	NA
coast_bottom	berggylte	Labrus_surmuletus	Labrus_bergylta	fishing_landing_statistic	fisheries_statistics	Havforskningsinst	Anne_Berit_Skiftesvik	anne.berit.skiftesvik@imr.no	1	1	1	1	0	Yes	0	0	0	0	0	0	100	0	0	100	NA	Actinopterygian	Vertebrate	na	Yes	No	IC	2	IC_spe	0	0	1	0	0	1	0	0	0	0	0	0	0	Pristine	LOW	NA
coast_bottom	bergnebb	Ctenolabrus_rupestris	Goldsinny	fishing_landing_statistic	fisheries_statistics	Havforskningsinst	Jakob_Gjøsæter	jakob.gjoesaeter@imr.no	1	1	1	0	0	Yes	0	0	0	0	0	0	100	0	0	100	NA	Actinopterygian	Vertebrate	na	Yes	No	IC	2	IC_spe	0	0	1	0	0	1	0	0	0	0	0	0	0	Pristine	LOW	NA
coast_bottom	blaskjell	Mytilus_edulis	Blue_mussel	biomass	population_size_density_biomass	NIVA/HI	Anke_Weber_Smit	anke.weber@niva.no	1	1	1	1	1	No	0	0	0	0	0	0	100	0	0	100	NA	Mollusc	Invertebrate	na	Yes	no	Fi	4	PCF	0	0	1	1	0	0	0	0	1	0	0	0	0	Pristine	MAX	NA
coast_bottom	blotbunn_artsmangfold_fauna	NA	index_of_benthic_fauna_species	Shannon_index	Theoric_index_previously_developped	NIVA	Brage_Rygg	brage.rygg@niva.no	1	1	1	1	1	Yes	0	0	0	0	0	0	100	0	0	100	NA	NA	Invertebrate	NA	No	Yes	Mu	NA	Ext	0	0	1	1	0	0	0	0	1	0	0	0	1	Traditional_management	LOW	NA
coast_bottom	blotbunn_toleranseindeks	NA	index_of_benthic_fauna_sensitivity	NQI1	Theoric_index_previously_developped	NIVA	Brage_Rygg	brage.rygg@niva.no	1	1	1	1	1	Yes	0	0	0	0	0	0	100	0	0	100	NA	NA	Invertebrate	NA	No	Yes	Mu	NA	Ext	0	0	1	1	0	0	0	0	1	0	0	0	1	Pristine	LOW	NA
coast_bottom	brakkvannsreke	Palaemonetes_varians	Atlantic_ditch_shrimp	area	area_coverage_occurence	NIVA/rødliste	Eivind_Oug	eivind.oug@niva.no	1	1	0	0	0	Yes	0	0	0	0	0	0	100	0	0	100	NA	Crustaceans	Invertebrate	NT	No	Yes	O	3	IC_gen	0	1	0	1	0	0	0	0	1	0	0	0	0	Pristine	LOW	NA
coast_bottom	drobakkrakebolle	Strongylocentrotus_droebachiensis	Green_sea_urchin/northern_sea_urchin	density	population_size_density_biomass	NIVA/HI	Hartvig_Christie	hartvig.christie@niva.no	1	1	1	1	1	Yes	0	0	0	0	0	0	100	0	0	100	NA	Echinoderma	Invertebrate	na	Yes	Yes	H	4	PCF	0	0	0	0	0	0	0	0	0	0	0	1	0	Pristine	MAX	NA
coast_bottom	dvergsivaks	Eleocharis_parvula	wetland_sedges	relative_rank	expert_relative_assessment	NIVA/rødliste	Marit_Mjelde	marit.mjelde@niva.no	1	1	1	1	0	Yes	0	0	0	0	0	0	100	0	0	100	NA	Angiosperma	Plant	NT	No	NA	PP	3	PP_gen	0	1	0	0	0	0	0	0	1	0	0	0	0	Pristine	LOW	NA
coast_bottom	fjorder_med_naturlig_lavt_o2	NA	Natural_anoxic_fjords_	HI/NIVA	NA	NA	Lene_Buhl_Mortensen	Lene.buhl.mortensen@imr.no	1	1	1	1	1	Yes	0	0	0	0	0	0	100	0	0	100	NA	na	NA	NA	No	Yes	PP	3	PP_gen	0	0	1	1	0	0	0	0	0	0	0	0	1	past_knowledge	MAX	NA
coast_bottom	gronngylte	Symphodus_melops	Corkwing_wrasse	fishing_landing_statistic	fisheries_statistics	Havforskningsinst	Jakob_Gjøsæter	jakob.gjoesaeter@imr.no	1	1	1	0	0	Yes	0	0	0	0	0	0	100	0	0	100	NA	Actinopterygian	Vertebrate	na	Yes	No	IC	2	IC_spe	0	0	1	0	0	1	0	0	0	0	0	0	0	Pristine	LOW	NA
coast_bottom	haneskjell	Clamys_islandica	Iceland_scallop	percentage_of_the_reference	expert_relative_assessment	Havforskningsinst	Lis_Lindahl_Jørgensen	lis.lindal.joergensen@imr.no	0	0	0	0	1	No	0	0	0	0	0	0	100	0	0	100	NA	Mollusc	Invertebrate	na	Yes	no	Fi	2	PCF	0	0	1	1	0	1	0	0	0	0	0	0	0	past_knowledge	OPT	NA
coast_bottom	hardbunn_vegetasjon_algeindeks	NA	macroalgae_intertidal_index	EQS	Theoric_index_previously_developped	NIVA	Tone_Kroglund	tone.kroglund@niva.no	1	1	1	1	1	Yes	0	0	0	0	0	0	100	0	0	100	NA	Algae	Plant	NA	No	Yes	PP	NA	Ext	0	0	1	1	0	0	0	0	1	0	0	0	1	Pristine	LOW	NA
coast_bottom	hardbunn_vegetasjon_nedre_voksegrense	NA	macroalgae_lower_limit_of_growth	EQS	Theoric_index_previously_developped	NIVA_	Are_Pedersen	are.pedersen@niva.no	1	1	1	1	1	Yes	0	0	0	0	0	0	100	0	0	100	NA	Algae	Plant	NA	No	Yes	PP	NA	Ext	0	0	1	1	0	0	0	0	1	0	0	0	1	Pristine	LOW	NA
coast_bottom	hummer	Homarus_gammarus	European_lobster	fishing_landing_statistic	fisheries_statistics	Havforskningsinst	Jan_Atle_Knutsen,_Ann-Lisbeth_Agnalt	jan.atle.knutsen@imr.no	1	1	1	1	0	Yes	0	0	0	0	0	0	100	0	0	100	NA	Crustaceans	Invertebrate	NT	Yes	no	IC	5	IC_gen	0	0	1	0	0	1	0	0	0	0	0	0	0	Traditional_management	OPT	NA
coast_bottom	kamskjell	Pecten_maximus	King_scallop	relative_rank	expert_relative_assessment	Havforskningsinst	Øivind_Strand	oivind.strand@imr.no	1	1	1	1	0	Yes	0	0	0	0	0	0	100	0	0	100	NA	Mollusc	Invertebrate	na	Yes	no	Fi	2	PCF	0	1	0	0	0	1	0	0	1	0	0	0	0	past_knowledge	OPT	NA
coast_bottom	korallrev	Lophelia_perfusa	Northern_coral_reef	relative_rank	expert_relative_assessment	Havforskningsinst	Jan_Helge_Fosså	jan.helge.fossaa@imr.no	1	0	1	1	1	Yes	0	0	0	0	0	0	100	0	0	100	NA	Cnidaria	Invertebrate	NA	No	no	Fi	2	Ext	0	1	1	0	0	0	0	0	1	1	0	1	0	Pristine	OPT	NA
coast_bottom	kveite	Hippoglossus_hippoglossus_	Atlantic_halibut	percentage_of_the_reference	expert_relative_assessment	Havforskningsinst	Kristin_Helle	kristin.helle@imr.no	1	1	1	1	1	No	0	0	0	0	0	25	75	0	0	75	NA	Actinopterygian	Vertebrate	NT	Yes	no	TP	4	TP_gen	0	0	1	1	0	1	0	0	0	0	0	0	0	past_knowledge	LOW	NA
coast_bottom	lyr	Pollachius_pollachius	Pollack	fishing_landing_statistic	fisheries_statistics	Havforskningsinst	Jakob_Gjøsæter	jakob.gjoesaeter@imr.no	1	1	1	1	1	No	0	0	0	0	0	0	40	25	35	40	NA	Actinopterygian	Vertebrate	na	Yes	no	Mu	3	IC_gen	0	0	0	1	0	1	0	0	0	0	0	0	0	Pristine	LOW	NA
coast_bottom	osters	Ostrea_edulis	European_oysters	relative_rank	expert_relative_assessment	Havforskningsinst	torjan_Bordvin/Øivind_Strand	oivind.strand@imr.no	1	1	1	0	0	Yes	0	0	0	0	0	0	100	0	0	100	NA	Mollusc	Invertebrate	na	Yes	no	Fi	2	PCF	0	0	1	0	1	0	0	0	0	0	0	0	0	past_knowledge	OPT	NA
coast_bottom	oter_kystbestand	Lutra_lutra	Otter	occurence	area_coverage_occurence	NINA	Jiska_van_Dijk	jiska.van.dijk@nina.no	1	1	1	1	1	Yes	0	0	0	0	0	0	100	0	0	100	NA	Mammals	Vertebrate	VU	No	Yes	TP	2	TP_spe	1	1	1	1	1	1	1	0	0	0	1	0	0	Pristine	OPT	NA
coast_bottom	rodspette	Pleuronectes_platessa	Plaice	percentage_of_the_reference	expert_relative_assessment	Havforskningsinst	Gro/_Tore_Jakobsen	tore.jakobsen@imr.no	1	1	1	1	1	Yes	0	0	0	0	0	0	100	0	0	100	NA	Actinopterygian	Vertebrate	na	Yes	no	Mu	2	IC_spe	0	0	0	1	0	1	0	0	0	0	0	0	0	Precautionary_level	LOW	NA
coast_bottom	sandskjell	Mya_arenaria	Sand_gaper	percentage_of_the_reference	expert_relative_assessment	NIVA_/rødliste	Eivind_Oug	eivind.oug@niva.no	1	1	1	1	1	Yes	0	0	0	0	0	0	100	0	0	100	NA	Mollusc	Invertebrate	VU	No	NA	Fi	3	PCF	0	0	0	0	0	0	0	0	0	0	1	0	0	past_knowledge	LOW	NA
coast_bottom	stortare	Laminaria_hyperborea	Cuvie	percentage_of_the_reference	expert_relative_assessment	NIVA/HI	NA	NA	1	1	1	1	1	Yes	0	0	0	0	0	0	100	0	0	100	NA	Algae	Plant	na	Yes	No	PP	3	Ext	0	0	1	0	0	1	0	0	0	0	0	1	0	Carrying_capacity	LOW	NA
coast_bottom	strandkrabbe	Carcinus_maenas	Europan_shore_crab	fishing_landing_statistic	fisheries_statistics	Havforskningsinst	Jakob_Gjøsæter	jakob.gjoesaeter@imr.no	1	1	1	1	1	Yes	0	0	0	0	0	0	100	0	0	100	NA	Crustaceans	Invertebrate	na	Yes	no	Mu	4	IC_gen	0	0	0	1	0	0	0	0	0	0	0	0	0	Pristine	OPT	NA
coast_bottom	sukkertare	Saccharina_latissima	Sugar_kelp	concentration	population_size_density_biomass	NIVA/_rødliste	Frithjof_Moy	frithjof.moy@niva.no	1	1	1	1	1	Yes	0	0	0	0	0	0	100	0	0	100	NA	Algae	Plant	NT	Yes	NA	PP	3	Ext	0	0	1	0	0	0	0	0	1	0	0	1	0	past_knowledge	LOW	NA
coast_bottom	svamp	Spongiformes	Sponges	occurence	area_coverage_occurence	Havforskningsinst	Raymond_Bannister	raymond.bannister@imr.no	1	1	1	1	1	Yes	0	0	0	0	0	0	100	0	0	100	NA	Porifera	Invertebrate	na	No	no	Fi	2	Ext	0	1	1	0	0	0	0	0	1	1	0	0	1	Pristine	OPT	NA
coast_bottom	taskekrabbe	Cancer_pagurus	Edible_crab	biomass	population_size_density_biomass	Havforskningsinst	Gro_van_der_Meeren	Gro.van.der.meeren@imr.no	1	1	1	1	0	Yes	0	0	0	0	0	0	100	0	0	100	NA	Crustaceans	Invertebrate	na	Yes	no	Mu	3	IC_gen	0	0	1	1	0	1	0	0	0	0	0	0	0	past_knowledge	OPT	NA
coast_bottom	torsk	Gadus_morhua	Atlantic_Cod	fishing_landing_statistic	fisheries_statistics	Havforskningsinst	Jakob_Gjøsæter/Asgeir_Aglen	asgeir.aglen@imr.no	1	1	1	1	1	No	0	0	0	0	0	20	80	0	0	80	NA	Actinopterygian	Vertebrate	NT	Yes	no	TP	3	TP_gen	0	0	1	1	0	1	0	0	0	0	0	1	0	Pristine	LOW	NA
coast_bottom	Kutling	NA	Gobidae	fishing_landing_statistic	fisheries_statistics	Havforskningsinst	Jakob_Gjøsæter	jakob.gjoesaeter@imr.no	0	1	1	1	0	Yes	0	0	0	0	0	0	100	0	0	100	NA	Actinopterygian	Vertebrate	na	No	no	IC	3	IC_gen	0	0	0	1	0	0	0	0	0	0	0	0	1	Pristine	LOW	NA
coast_bottom	piggha	Squalus_acanthias	Dogfish	percentage_of_the_reference	expert_relative_assessment	Havforskningsinst	Tove_Vollen	tove.vollen@imr.no	1	1	1	1	1	No	0	0	0	0	0	0	30	0	70	70	NA	Chondrychtian	Vertebrate	CR	Yes	no	TP	3	TP_gen	0	0	0	1	0	1	0	0	0	0	1	0	0	past_knowledge	LOW	NA
coast_bottom	Teist	Cepphus_grylle	black_guillemot	demographic_trend	demographic_parameter	NINA	Svein_Håkon_Lorentsen	svein.h.lorentsen@nina.no	0	1	1	1	1	No	30	0	0	0	0	0	70	0	0	70	NA	Bird	Vertebrate	NA	No	no	TP	2	TP_spe	1	0	1	1	1	1	0	0	0	0	0	0	0	Precautionary_level	LOW	NA
coast_bottom	aerfugl	Somateria_mollissima	common_eider	demographic_trend	demographic_parameter	NINA	Svein_Håkon_Lorentsen	svein.h.lorentsen@nina.no	1	1	1	1	1	No	30	0	0	0	0	0	70	0	0	70	NA	Bird	Vertebrate	NA	Yes	no	IC	3	IC_gen	1	0	1	1	1	1	0	0	0	0	0	0	0	Precautionary_level	LOW	NA
coast_bottom	sjoorre	Melanitta_fusca	velvet_scoter	percentage_of_the_reference	expert_relative_assessment	NINA	Jan_Ove_Gjershaug	jan.o.gjershaug@nina.no	1	1	1	1	1	No	0	25	25	0	0	0	50	0	0	50	L	Bird	Vertebrate	NT	Yes	no	IC	2	IC_spe	0	0	0	0	0	0	1	0	0	0	0	0	0	Pristine	LOW	NA
coast_bottom	stellerand	Polysticta_stelleri	steller's_eider	percentage_of_the_reference	expert_relative_assessment	NINA	Jan_Ove_Gjershaug	jan.o.gjershaug@nina.no	0	0	0	0	1	Yes	0	0	0	0	0	0	100	0	0	100	NA	Bird	Vertebrate	VU	Yes	no	IC	2	IC_spe	0	0	0	0	0	0	0	0	0	0	1	0	0	Pristine	LOW	NA
coast_bottom	svartand	Melanitta_nigra	common_scoter	percentage_of_the_reference	expert_relative_assessment	NINA	Jan_Ove_Gjershaug	jan.o.gjershaug@nina.no	1	1	1	1	1	No	0	25	25	0	0	0	50	0	0	50	L	Bird	Vertebrate	LC	Yes	no	IC	2	IC_spe	0	0	0	0	0	0	1	0	0	0	0	0	0	Pristine	LOW	NA
coast_pelagic	dyreplankton_biomasse	NA	Zooplankton	biomass	population_size_density_biomass	Havforskningsinst	Webjørn_welle,_Tone_falkenhaug	tone.falkenhaug@imr.no	1	1	1	1	1	Yes	0	0	0	0	0	100	0	0	0	100	NA	Crustaceans	Invertebrate	na	No	Yes	H	2	Ext	0	0	1	1	0	0	0	0	1	1	0	1	1	Pristine	LOW	NA
coast_pelagic	havert	Halichoerus_grypus_	Hooded_seal	NA	NA	Havforskningsinst	Kjell_Tormod_Nilssen	kjell.tormod.nilssen@imr.no	0	0	1	1	1	No	0	0	0	0	0	70	30	0	0	70	NA	Mammals	Vertebrate	NT	Yes	no	TP	2	TP_spe	0	0	1	1	0	1	0	0	0	0	0	0	0	Pristine	OPT	NA
coast_pelagic	maneter	Cyana_capillata	Lions_mane	Relative_density	population_size_density_biomass	Havforskningsinst	Tone_Falkenhaug	Tone.Falkenhaug@imr.no	1	1	1	1	1	Yes	0	0	0	0	0	100	0	0	0	100	NA	Cnidaria	Invertebrate	na	No	Yes	IC	2	IC_spe	0	0	1	1	0	0	0	0	0	0	0	1	0	Pristine	MAX	NA
coast_pelagic	Plantplankton_(Chl_a)	NA	Phytoplankton	concentration	population_size_density_biomass	NIVA/HI	Wenche_Eikrem	wenche.eikrem@niva.no	1	1	1	1	1	Yes	0	0	0	0	0	100	0	0	0	100	NA	Algae	Plant	na	No	Yes	PP	NA	Ext	0	0	1	0	0	0	0	0	1	0	0	0	1	past_knowledge	MAX	NA
coast_pelagic	rognkjeks_rognkall	Cyclopterus_lumpus	Lumpfish	CPUE	fisheries_statistics	Havforskningsinst	Knut_Sunnanå	knut.sunnanaa@imr.no	1	1	1	1	1	No	0	0	0	0	0	35	65	0	0	65	NA	Actinopterygian	Vertebrate	na	Yes	no	TP	2	TP_spe	0	0	0	1	0	1	0	0	0	0	0	0	0	Traditional_management	LOW	NA
coast_pelagic	sild	Clupea_harengus	Herring	percentage_of_the_reference	expert_relative_assessment	Havforskningsinst	Cecilie_Kvamme	cecilie.kvamme@imr.no	1	1	1	1	1	Yes	0	0	0	0	0	100	0	0	0	100	NA	Actinopterygian	Vertebrate	na	Yes	no	IC	2	Ext	0	0	1	0	0	1	0	0	0	0	0	1	0	Precautionary_level	LOW	NA
coast_pelagic	spekkhogger	Orcinus_orca	Killer_whale	percentage_of_the_reference	expert_relative_assessment	Havforskningsinst	Nils_Øien	nils.oien@imr.no	1	1	1	1	1	No	0	0	0	0	0	60	0	40	0	60	NA	Mammals	Vertebrate	na	Yes	no	TP	2	TP_spe	0	0	0	1	0	0	0	0	0	0	0	0	0	past_knowledge	OPT	NA
coast_pelagic	steinkobbe	Phoca_vitulina	Harbour_seal	abundance	population_size_density_biomass	Havforskningsinst	Kjell_Tormod_Nilssen	kjell.tormod.nilssen@imr.no	1	1	1	1	1	No	0	0	0	0	0	70	30	0	0	70	NA	Mammals	Vertebrate	na	Yes	no	TP	2	TP_gen	0	0	1	1	0	1	0	0	0	0	0	0	0	past_knowledge	OPT	NA
coast_pelagic	tobis	Ammodytes_sp.	Sand_eel	percentage_of_the_reference	expert_relative_assessment	Havforskningsinst	Tore_Johannesen	tore.Johannesen@imr.no	1	1	1	1	0	No	0	0	0	0	0	30	70	0	0	70	NA	Actinopterygian	Vertebrate	na	Yes	no	Mu	2	IC_spe	0	0	1	1	0	1	0	0	0	0	0	1	0	Precautionary_level	LOW	NA
coast_pelagic	havhest	Fulmarus_glacialis	northern_fulmar	demographic_trend	demographic_parameter	NINA	Svein_Håkon_Lorentsen	svein.h.lorentsen@nina.no	0	1	1	1	1	No	10	0	0	0	0	30	0	60	0	60	NA	Bird	Vertebrate	NA	No	no	Mu	3	TP_gen	1	0	1	1	0	1	0	0	0	0	0	0	0	Precautionary_level	LOW	NA
coast_pelagic	Havsule	Morus_bassanus	northern_gannet	demographic_trend	demographic_parameter	NINA	Svein_Håkon_Lorentsen	svein.h.lorentsen@nina.no	0	0	1	1	1	No	10	0	0	0	0	30	0	60	0	60	NA	Bird	Vertebrate	NA	Yes	no	TP	2	TP_spe	1	0	1	1	0	1	0	0	0	0	0	0	0	Precautionary_level	LOW	NA
coast_pelagic	Storskarv_ssp_carbo	Phalacrocorax_carbo_carbo	great_cormorant_ssp_carbo	demographic_trend	demographic_parameter	NINA	Svein_Håkon_Lorentsen	svein.h.lorentsen@nina.no	0	0	1	1	1	Yes	0	0	0	0	0	100	0	0	0	100	NA	Bird	Vertebrate	NA	Yes	no	TP	3	TP_gen	1	0	1	1	0	0	0	0	0	0	0	0	0	Precautionary_level	LOW	NA
coast_pelagic	Storskarv_ssp_sinensis	Phalacrocorax_carbo_sinensis	great_cormorant_ssp_sinensis	demographic_trend	demographic_parameter	NINA	Svein_Håkon_Lorentsen	svein.h.lorentsen@nina.no	1	1	0	0	0	Yes	0	0	0	0	0	100	0	0	0	100	NA	Bird	Vertebrate	NA	Yes	no	TP	3	TP_gen	1	0	1	1	0	0	0	0	0	0	0	0	0	Precautionary_level	LOW	NA
coast_pelagic	Toppskarv	Phalacrocorax_aristotelis	european_shag	demographic_trend	demographic_parameter	NINA	Svein_Håkon_Lorentsen	svein.h.lorentsen@nina.no	0	0	1	1	1	Yes	0	0	0	0	0	100	0	0	0	100	NA	Bird	Vertebrate	NA	Yes	no	TP	3	TP_gen	1	0	1	1	1	1	0	0	0	0	0	0	0	Precautionary_level	LOW	NA
coast_pelagic	Storjo	Stercorarius_skua	great_skua	demographic_trend	demographic_parameter	NINA	Svein_Håkon_Lorentsen	svein.h.lorentsen@nina.no	0	0	0	1	1	No	10	0	0	0	0	45	0	45	0	45	NA	Bird	Vertebrate	LC	No	no	TP	2	TP_spe	1	0	1	1	0	0	0	0	0	0	0	0	0	Precautionary_level	LOW	NA
coast_pelagic	Fiskemåke	Larus_canus	common_gull	demographic_trend	demographic_parameter	NINA	Svein_Håkon_Lorentsen	svein.h.lorentsen@nina.no	1	1	1	1	1	No	50	0	0	0	0	50	0	0	0	50	NA	Bird	Vertebrate	NA	Yes	no	O	3	TP_gen	1	0	0	0	1	1	0	0	0	0	0	0	0	Precautionary_level	LOW	NA
coast_pelagic	Sildemåke_ssp_fuscus	Larus_fuscus_fuscus	lesser_black-backed_gull_ssp_fuscus	demographic_trend	demographic_parameter	NINA	Svein_Håkon_Lorentsen	svein.h.lorentsen@nina.no	0	0	1	1	1	No	10	0	0	0	0	90	0	0	0	90	NA	Bird	Vertebrate	NA	No	no	TP	2	TP_spe	1	0	1	1	1	1	0	0	0	0	0	0	0	Precautionary_level	LOW	NA
coast_pelagic	Sildemåke_ssp_intermedius	Larus_fuscus_intermedius	lesser_black-backed_gull_ssp_intermedius	demographic_trend	demographic_parameter	NINA	Svein_Håkon_Lorentsen	svein.h.lorentsen@nina.no	1	1	0	0	0	No	10	0	0	0	0	90	0	0	0	90	NA	Bird	Vertebrate	NA	No	no	TP	2	TP_spe	1	0	1	1	1	1	0	0	0	0	0	0	0	Precautionary_level	LOW	NA
coast_pelagic	Gråmåke	Larus_argentatus	herrring_gull	demographic_trend	demographic_parameter	NINA	Svein_Håkon_Lorentsen	svein.h.lorentsen@nina.no	1	1	1	1	1	No	50	0	0	0	0	50	0	0	0	50	NA	Bird	Vertebrate	NA	Yes	no	O	5	TP_gen	1	0	0	1	0	0	0	0	0	0	0	0	0	Precautionary_level	LOW	NA
coast_pelagic	Svartbak	Larus_marinus	great_black_backed_gull	demographic_trend	demographic_parameter	NINA	Svein_Håkon_Lorentsen	svein.h.lorentsen@nina.no	1	1	1	1	1	No	50	0	0	0	0	50	0	0	0	50	NA	Bird	Vertebrate	NA	Yes	no	O	5	TP_gen	1	0	0	1	0	0	0	0	0	0	0	0	0	Precautionary_level	LOW	NA
coast_pelagic	Krykkje	Rissa_tridactyla	black-legged_kittiwake	demographic_trend	demographic_parameter	NINA	Svein_Håkon_Lorentsen	svein.h.lorentsen@nina.no	0	0	1	1	1	No	20	0	0	0	0	80	0	0	0	80	NA	Bird	Vertebrate	VU	Yes	no	TP	3	TP_gen	1	0	1	1	1	1	0	0	0	0	1	0	0	Precautionary_level	LOW	NA
coast_pelagic	Makrellterne	Sterna_hirundo	common_tern	demographic_trend	demographic_parameter	NINA	Svein_Håkon_Lorentsen	svein.h.lorentsen@nina.no	1	1	1	1	1	No	10	0	0	0	0	90	0	0	0	90	NA	Bird	Vertebrate	VU	Yes	no	TP	2	TP_spe	1	0	1	1	1	1	0	0	0	0	1	0	0	Precautionary_level	LOW	NA
coast_pelagic	Rødnebbterne	Sterna_Paradisaea	arctic_tern	demographic_trend	demographic_parameter	NINA	Svein_Håkon_Lorentsen	svein.h.lorentsen@nina.no	0	1	1	1	1	No	10	0	0	0	0	90	0	0	0	90	NA	Bird	Vertebrate	NA	Yes	no	TP	2	TP_spe	1	0	1	1	1	1	0	0	0	0	0	0	0	Precautionary_level	LOW	NA
coast_pelagic	Alke	Alca_torda	razorbill	demographic_trend	demographic_parameter	NINA	Svein_Håkon_Lorentsen	svein.h.lorentsen@nina.no	0	0	1	1	1	No	10	0	0	0	0	30	0	60	0	60	NA	Bird	Vertebrate	NA	No	no	TP	2	TP_spe	1	0	1	1	1	1	0	0	0	0	0	0	0	Precautionary_level	LOW	NA
coast_pelagic	Lomvi	Uria_aalge	common_murre	demographic_trend	demographic_parameter	NINA	Svein_Håkon_Lorentsen	svein.h.lorentsen@nina.no	0	0	1	1	1	No	10	0	0	0	0	30	0	60	0	60	NA	Bird	Vertebrate	CR	Yes	no	TP	2	TP_spe	1	0	1	1	1	1	0	0	0	0	1	0	0	Precautionary_level	LOW	NA
coast_pelagic	Polarlomvi	Uria_lomvia	thick-billed_murre	demographic_trend	demographic_parameter	NINA	Svein_Håkon_Lorentsen	svein.h.lorentsen@nina.no	0	0	0	0	1	No	10	0	0	0	0	30	0	60	0	60	NA	Bird	Vertebrate	NT	Yes	no	TP	2	TP_spe	1	0	1	1	1	1	0	0	0	0	0	0	0	Precautionary_level	LOW	NA
coast_pelagic	Lunde	Fratercula_arctica	atlantic_puffin	demographic_trend	demographic_parameter	NINA	Svein_Håkon_Lorentsen	svein.h.lorentsen@nina.no	0	0	1	1	1	No	10	0	0	0	0	30	0	60	0	60	NA	Bird	Vertebrate	VU	Yes	no	TP	2	TP_spe	1	0	1	1	1	1	0	0	0	0	1	0	0	Precautionary_level	LOW	NA
coast_pelagic	gulnebblom	Gavia_adamsii	yellow-billed_loon	percentage_of_the_reference	expert_relative_assessment	NINA	Jan_Ove_Gjershaug	jan.o.gjershaug@nina.no	1	1	1	1	1	Yes	0	0	0	0	0	100	0	0	0	100	NA	Bird	Vertebrate	NT	Yes	no	IC	3	IC_gen	0	0	0	0	0	0	0	0	0	0	0	0	0	Pristine	LOW	NA
coast_pelagic	siland	Mergus_serrator	red-breasted_merganser	percentage_of_the_reference	expert_relative_assessment	NINA	Jan_Ove_Gjershaug	jan.o.gjershaug@nina.no	1	1	1	1	1	Yes	0	0	0	0	0	100	0	0	0	100	NA	Bird	Vertebrate	LC	Yes	no	IC	2	IC_spe	0	0	0	0	1	0	0	0	0	0	0	0	0	Pristine	LOW	NA
mires_wetland	alvemose	Hamatocaulis_vernicosus	moss	Geographical_extent	area_coverage_occurence	VM/rødliste	Kristian_Hassel	kristian.hassel@vm.ntnu.no	1	0	1	1	1	Yes	0	0	100	0	0	0	0	0	0	100	NA	Bryophyta	Plant	VU	No	No	PP	1	PP_spe	1	0	0	0	0	0	0	0	0	0	1	0	0	past_knowledge	LOW	NA
mires_wetland	atlantisk_hogmyr_areal	NA	Atlantic_raised_bog	area	area_coverage_occurence	NINA	Jarle_W._Bjerke	jarle.werner.bjerke@nina.no	0	1	1	1	1	Yes	0	0	100	0	0	0	0	0	0	100	NA	NA	Plant	EN	Yes	Yes	Mi	NA	Ext	1	1	1	0	0	0	0	0	1	0	1	1	1	past_knowledge	LOW	NA
mires_wetland	billeart_sumpløper	Elaphrus_uliginosus	Carabidae_sp.	occurence	area_coverage_occurence	NINA,_rødliste	Frode_Ødegaard	frode.odegaard@nina.no	1	1	1	1	1	Yes	0	0	100	0	0	0	0	0	0	100	NA	Insects	Invertebrate	VU	No	Yes	IC	2	IC_spe	1	1	0	0	0	0	0	0	1	0	1	0	0	Pristine	LOW	NA
mires_wetland	elvesandjeger	Cicindela_maritima	Carabidae_sp.	adult_abundance	population_size_density_biomass	NINA,_rødliste	Frode_Ødegaard	frode.odegaard@nina.no	1	0	0	1	1	Yes	0	0	100	0	0	0	0	0	0	100	NA	Insects	Invertebrate	EN	No	Yes	IC	1	Ext	1	1	0	1	0	0	0	0	0	0	1	0	0	Pristine	LOW	NA
mires_wetland	fjellgittermose	Cinclidium_arcticum	moss	Geographical_extent	area_coverage_occurence	VM/rødliste	Kristian_Hassel	kristian.hassel@vm.ntnu.no	0	0	0	1	1	Yes	0	0	100	0	0	0	0	0	0	100	NA	Bryophyta	Plant	VU	No	No	PP	1	PP_spe	0	0	1	0	0	0	0	0	0	0	1	0	0	past_knowledge	LOW	NA
mires_wetland	myrtelg	Thelypteris_palustris	Marsh_Fern	area	area_coverage_occurence	NINA	Odd_Stabbetorp/Olav_Skarpaas/Ander_Often	olav.skarpaas@nina.no	1	1	0	0	0	Yes	0	0	100	0	0	0	0	0	0	100	NA	Polypodiopsida	Plant	EN	No	Yes	PP	1	PP_spe	1	0	0	0	0	0	1	0	0	1	1	0	0	Pristine	LOW	NA
mires_wetland	overskridelser_talegrenser_N_myr	NA	Critical_load_N_exceedance	concentration	population_size_density_biomass	NIVA	Thorjørn_Larssen	thorjorn.larssen@niva.no	1	1	1	1	1	No	33	33	34	0	0	0	0	0	0	34	NA	NA	NA	NA	No	no	NA	NA	Ext	0	0	0	1	0	0	0	0	0	0	0	1	0	Maximum_sustainable_level	MAX	NA
mires_wetland	palsmyr_areal	NA	Palsa_mire	area	area_coverage_occurence	NINA	Jarle_W._Bjerke	jarle.werner.bjerke@nina.no	1	0	0	1	1	Yes	0	0	100	0	0	0	0	0	0	100	NA	NA	Plant	EN	No	No	Mi	NA	Ext	0	0	1	0	0	0	0	0	0	0	1	1	0	Pristine	LOW	NA
mires_wetland	sennegras	Carex_vesicaria	Bladder_Sedge	area	area_coverage_occurence	NINA	Per_Arild_Aarrestad	per.a.aarrestad@nina.no	1	1	1	1	1	Yes	0	0	100	0	0	0	0	0	0	100	NA	Angiosperma	Plant	NA	No	No	PP	3	PP_gen	1	0	0	0	0	0	1	0	1	1	0	1	0	Pristine	OPT	NA
mires_wetland	smasalamander	Lissotriton_vulgaris	Smooth_Newt	percentage_of_the_reference	expert_relative_assessment	NINA_+VM	Jon_Kristian_Skei	krisskei@online.no	1	1	1	1	1	No	20	0	60	20	0	0	0	0	0	60	NA	Amphibians	Vertebrate	NT	No	no	IC	3	IC_gen	1	1	1	1	0	0	1	0	0	1	0	0	0	Traditional_management	LOW	NA
mires_wetland	stakesvanemose	Meesia_longiseta	moss	Geographical_extent	area_coverage_occurence	VM/rødliste	Kristian_Hassel	kristian.hassel@vm.ntnu.no	1	0	0	1	1	Yes	0	0	100	0	0	0	0	0	0	100	NA	Bryophyta	Plant	VU	No	No	PP	1	PP_spe	1	0	0	0	0	0	0	0	0	0	1	0	0	past_knowledge	LOW	NA
mires_wetland	storsalamander	Triturus_cristatus	Great_Crested_Newt	percentage_of_the_reference	expert_relative_assessment	NINA_+VM	Jon_Kristian_Skei	krisskei@online.no	1	1	1	1	0	No	0	0	75	25	0	0	0	0	0	75	NA	Amphibians	Vertebrate	VU	No	no	IC	2	IC_spe	1	1	1	1	0	0	1	0	0	1	1	0	0	Traditional_management	LOW	NA
mires_wetland	sveltstarr	Carex_pauciflora	Few-flowered_Sedge	area	area_coverage_occurence	NINA	Per_Arild_Aarrestad	per.a.aarrestad@nina.no	1	1	1	1	1	Yes	0	0	100	0	0	0	0	0	0	100	NA	Angiosperma	Plant	NA	No	No	PP	2	PP_spe	1	0	0	0	0	0	0	0	1	0	0	1	0	Pristine	LOW	NA
mires_wetland	engmarihand	Dactylorhiza_incarnata_ssp.incarnata	Early_Marsh-Orchid	area	area_coverage_occurence	NINA	Odd_Stabbetorp/Olav_Skarpaas/Ander_Often	olav.skarpaas@nina.no	1	1	1	1	1	Yes	0	0	100	0	0	0	0	0	0	100	NA	Angiosperma	Plant	NT	No	Yes	PP	2	PP_spe	1	0	0	0	0	0	0	0	1	1	0	0	0	Pristine	LOW	NA
mires_wetland	vanlig_frosk	Rana_temporaria	Common_Frog	percentage_of_the_reference	expert_relative_assessment	NINA_+VM	Jon_Kristian_Skei	krisskei@online.no	1	1	1	1	1	No	20	0	60	20	0	0	0	0	0	60	NA	Amphibians	Vertebrate	NA	No	no	Mu	4	IC_gen	1	1	1	1	0	0	1	0	0	1	0	0	0	Traditional_management	LOW	NA
mires_wetland	brushane	Philomachus_pugnax	ruff	percentage_of_the_reference	expert_relative_assessment	NINA	Jan_Ove_Gjershaug	jan.o.gjershaug@nina.no	1	1	1	1	1	Yes	0	0	100	0	0	0	0	0	0	100	NA	Bird	Vertebrate	NA	Yes	no	IC	3	IC_gen	0	1	0	0	1	0	0	0	0	0	0	0	0	Pristine	LOW	NA
mires_wetland	dobbeltbekkasin	Gallinago_media	great_snipe	percentage_of_the_reference	expert_relative_assessment	NINA	Jan_Ove_Gjershaug	jan.o.gjershaug@nina.no	1	1	1	1	1	Yes	0	0	100	0	0	0	0	0	0	100	NA	Bird	Vertebrate	NT	Yes	no	IC	2	IC_spe	1	0	0	0	0	0	0	0	0	0	0	0	0	Pristine	LOW	NA
mires_wetland	enkeltbekkasin	Gallinago_gallinago	common_snipe	percentage_of_the_reference	expert_relative_assessment	NINA	Jan_Ove_Gjershaug	jan.o.gjershaug@nina.no	1	1	1	1	1	Yes	0	0	100	0	0	0	0	0	0	100	NA	Bird	Vertebrate	LC	Yes	no	IC	4	IC_gen	1	0	0	0	0	0	0	0	0	0	0	0	0	Pristine	LOW	NA
mires_wetland	fjellmyrloper	Limicola_falcinellus	broad-bill_sandpiper	percentage_of_the_reference	expert_relative_assessment	NINA	Jan_Ove_Gjershaug	jan.o.gjershaug@nina.no	1	1	0	1	1	Yes	0	0	100	0	0	0	0	0	0	100	NA	Bird	Vertebrate	VU	Yes	no	IC	3	IC_gen	0	1	0	0	0	0	1	0	0	0	1	0	0	Pristine	LOW	NA
mires_wetland	gluttsnipe	Tringa_nebularia	greenshank	percentage_of_the_reference	expert_relative_assessment	NINA	Jan_Ove_Gjershaug	jan.o.gjershaug@nina.no	1	1	1	1	1	Yes	0	0	100	0	0	0	0	0	0	100	NA	Bird	Vertebrate	LC	Yes	no	IC	3	IC_gen	0	1	0	0	0	0	1	0	0	0	0	0	0	Pristine	LOW	NA
mires_wetland	gronnstilk	Tringa_glareola	wood_sandpiper	percentage_of_the_reference	expert_relative_assessment	NINA	Jan_Ove_Gjershaug	jan.o.gjershaug@nina.no	1	1	1	1	1	Yes	0	0	100	0	0	0	0	0	0	100	NA	Bird	Vertebrate	LC	Yes	no	IC	3	IC_gen	0	1	0	0	0	0	1	0	0	0	0	0	0	Pristine	LOW	NA
mires_wetland	gulerle	Motacilla_flava	yellow_wagtail	percentage_of_the_reference	expert_relative_assessment	NINA	Jan_Ove_Gjershaug	jan.o.gjershaug@nina.no	1	1	1	1	1	Yes	0	0	100	0	0	0	0	0	0	100	NA	Bird	Vertebrate	LC	Yes	no	IC	3	IC_gen	0	1	0	0	0	0	0	0	0	0	0	0	0	Pristine	LOW	NA
mires_wetland	lappspove	Limosa_lapponica	bar-tailed_godwit	percentage_of_the_reference	expert_relative_assessment	NINA	Jan_Ove_Gjershaug	jan.o.gjershaug@nina.no	1	0	0	0	1	Yes	0	0	100	0	0	0	0	0	0	100	NA	Bird	Vertebrate	LC	Yes	no	IC	3	IC_gen	0	0	0	0	0	0	0	0	0	0	0	0	0	Pristine	LOW	NA
mires_wetland	myrsnipe	Calidris_alpina	dunlin	percentage_of_the_reference	expert_relative_assessment	NINA	Jan_Ove_Gjershaug	jan.o.gjershaug@nina.no	1	1	1	1	1	Yes	0	0	100	0	0	0	0	0	0	100	NA	Bird	Vertebrate	NA	Yes	no	IC	3	IC_gen	0	0	0	0	0	0	0	0	0	0	0	0	0	Pristine	LOW	NA
mires_wetland	rodstilk	Tringa_totanus	common_redshank	percentage_of_the_reference	expert_relative_assessment	NINA	Jan_Ove_Gjershaug	jan.o.gjershaug@nina.no	1	1	1	1	1	Yes	0	0	100	0	0	0	0	0	0	100	NA	Bird	Vertebrate	LC	Yes	no	IC	3	IC_gen	1	1	0	0	0	0	0	0	0	0	0	0	0	Pristine	LOW	NA
mires_wetland	sivsanger	Acrocephalus_schoenobaenus	sedge_warbler	percentage_of_the_reference	expert_relative_assessment	NINA	Jan_Ove_Gjershaug	jan.o.gjershaug@nina.no	1	1	1	1	1	Yes	0	0	100	0	0	0	0	0	0	100	NA	Bird	Vertebrate	LC	Yes	no	IC	3	IC_gen	0	1	0	0	0	0	0	0	0	0	0	0	0	Pristine	LOW	NA
mires_wetland	sivspurv	Emberiza_schoeniclus	reed_bunting	percentage_of_the_reference	expert_relative_assessment	NINA	Jan_Ove_Gjershaug	jan.o.gjershaug@nina.no	1	1	1	1	1	Yes	0	0	100	0	0	0	0	0	0	100	NA	Bird	Vertebrate	LC	Yes	no	H	3	PCF	0	1	0	0	0	0	0	0	0	0	0	0	0	Pristine	LOW	NA
mires_wetland	smaspove	Numenius_phaeopus	whimbrel	percentage_of_the_reference	expert_relative_assessment	NINA	Jan_Ove_Gjershaug	jan.o.gjershaug@nina.no	1	1	1	1	1	Yes	0	0	100	0	0	0	0	0	0	100	NA	Bird	Vertebrate	LC	Yes	no	IC	3	IC_gen	0	1	0	0	0	0	0	0	0	0	0	0	0	Pristine	LOW	NA
mires_wetland	svommesnipe	Phalaropus_lobatus	Red-necked_Phalarope	percentage_of_the_reference	expert_relative_assessment	NINA	Jan_Ove_Gjershaug	jan.o.gjershaug@nina.no	1	1	1	1	1	No	0	50	50	0	0	0	0	0	0	50	L	Bird	Vertebrate	LC	Yes	no	IC	3	IC_gen	0	1	0	0	0	0	1	0	0	0	0	0	0	Pristine	LOW	NA
mires_wetland	trane	Grus_grus	common_crane	percentage_of_the_reference	expert_relative_assessment	NINA	Jan_Ove_Gjershaug	jan.o.gjershaug@nina.no	1	1	1	1	1	Yes	0	0	100	0	0	0	0	0	0	100	NA	Bird	Vertebrate	LC	Yes	no	H	3	PCF	0	1	0	0	0	0	1	0	0	0	0	0	0	Pristine	LOW	NA
mires_wetland	kvitmyrak	Rhynchospora_alba	white_beak-sedge	area	area_coverage_occurence	NINA	Odd_Stabbetorp/Olav_Skarpaas/Ander_Often	olav.skarpaas@nina.no	1	1	1	1	1	Yes	0	0	100	0	0	0	0	0	0	100	NA	Angiosperma	Plant	NA	No	Yes	PP	2	PP_spe	1	0	0	0	0	0	1	0	1	0	0	0	0	Pristine	LOW	NA
mires_wetland	brunmyrak	Rhynchospora_fusca	brown_beak-sedge	area	area_coverage_occurence	NINA	Odd_Stabbetorp/Olav_Skarpaas/Ander_Often	olav.skarpaas@nina.no	1	1	1	1	0	Yes	0	0	100	0	0	0	0	0	0	100	NA	Angiosperma	Plant	NA	No	Yes	PP	1	PP_spe	1	0	0	0	0	0	1	0	1	0	0	0	0	Pristine	LOW	NA
mires_wetland	smalsoldogg	Drosera_anglica	Great_sundew	area	area_coverage_occurence	NINA	Odd_Stabbetorp/Olav_Skarpaas/Ander_Often	olav.skarpaas@nina.no	1	1	1	1	1	Yes	0	0	100	0	0	0	0	0	0	100	NA	Angiosperma	Plant	NA	No	Yes	PP	2	PP_spe	1	0	0	0	0	0	1	0	1	0	0	0	0	Pristine	LOW	NA
mires_wetland	dikesoldogg	Drosera_intermedia	oblong-leaved_sundew	area	area_coverage_occurence	NINA	Odd_Stabbetorp/Olav_Skarpaas/Ander_Often	olav.skarpaas@nina.no	1	1	1	1	0	Yes	0	0	100	0	0	0	0	0	0	100	NA	Angiosperma	Plant	NA	No	Yes	PP	2	PP_spe	1	0	0	0	0	0	1	0	1	0	0	0	0	Pristine	LOW	NA
forest	algae_pa_bjork	NA	algae_on_Birch	density	population_size_density_biomass	NINA	Inga_Bruteig	Inga.Bruteig@nina.no	1	1	1	1	1	Yes	0	0	0	100	0	0	0	0	0	100	NA	Algae	Plant	NA	No	Yes	PP	1	PP_spe	0	0	0	0	0	0	0	0	1	0	0	0	0	Maximum_sustainable_level	MAX	NA
forest	alm	Ulmus_glabra	Scots_Elm	area	area_coverage_occurence	NINA	Odd_Stabbetorp/Olav_Skarpaas/Ander_Often	olav.skarpaas@nina.no	1	1	1	1	1	Yes	0	0	0	100	0	0	0	0	0	100	NA	Angiosperma	Plant	NT	Yes	No	PP	3	PP_gen	1	1	1	0	0	0	0	0	0	0	0	0	0	Pristine	LOW	NA
forest	bananslørsopp	Cortinarius_nanceiensis	NA	occurence	area_coverage_occurence	NINA,_rødliste	Tor_Brandrud	tor.brandrud@nina.no	1	1	1	1	1	Yes	0	0	0	100	0	0	0	0	0	100	NA	Fungi	Fungi	VU	No	Yes	Mi	1	PP_spe	1	1	0	0	0	0	0	0	0	0	1	0	0	past_knowledge	LOW	NA
forest	begerfingersopp	Artomyces_pyxidatus	NA	percentage_of_the_reference	expert_relative_assessment	NINA,_rødliste	Tor_Brandrud	tor.brandrud@nina.no	1	1	1	1	1	Yes	0	0	0	100	0	0	0	0	0	100	NA	Fungi	Fungi	NT	No	no	Mi	1	Dec	1	1	0	0	0	0	0	0	0	0	0	0	0	past_knowledge	LOW	NA
forest	brunbjorn	Ursus_arctos	brown_bear	reproductive_unit	population_size_density_biomass	NINA	Henrik_Brøseth	Henrik.Brøseth@nina.no	1	1	1	1	1	No	0	0	0	75	25	0	0	0	0	75	NA	Mammals	Vertebrate	CR	Yes	Yes	TP	3	TP_gen	1	1	0	0	0	1	0	0	0	0	0	1	0	Pristine	OPT	1
forest	Lengde_vekstsesong_naturlig_vegetasjon	NA	Length_of_growing_season_for_natural_vegetation	relative_rank	expert_relative_assessment	NINA	Jarle_W._Bjerke	jarle.werner.bjerke@nina.no	1	1	1	1	1	No	10	0	10	80	0	0	0	0	0	80	NA	NA	Plant	NA	Yes	Yes	PP	NA	PP_gen	0	0	1	0	0	0	0	0	0	0	0	1	0	Pristine	OPT	NA
forest	blåbærdekning	Vaccinium_myrtillus	bilberry	area	area_coverage_occurence	Skog_og_landskap	Jan_Erik_Nilsen	jan-erik.nilsen@skogoglandskap.no	1	1	1	1	1	Yes	0	0	0	100	0	0	0	0	0	100	NA	Angiosperma	Plant	NA	NA	NA	PP	2	Ext	1	0	0	0	0	0	0	0	0	0	0	0	0	Pristine	LOW	NA
forest	brun_hvitkjuke	Antrodia_albobrunnea_	NA	percentage_of_the_reference	expert_relative_assessment	NINA,_rødliste	Tor_Brandrud	tor.brandrud@nina.no	1	1	1	1	1	Yes	0	0	0	100	0	0	0	0	0	100	NA	Fungi	Fungi	NT	No	no	Mi	1	Dec	1	1	0	0	0	0	0	0	0	0	0	0	0	past_knowledge	OPT	NA
forest	eldre_lauvsuksesjon_MiS	NA	NA	area	area_coverage_occurence	Skog_og_landskap	Jan_Erik_Nilsen	jan-erik.nilsen@skogoglandskap.no	1	1	1	1	1	Yes	0	0	0	100	0	0	0	0	0	100	NA	NA	NA	NA	NA	NA	NA	NA	Ext	1	0	0	0	0	0	0	0	0	0	0	0	1	Pristine	LOW	NA
forest	elg	Alces_alces	moose	density	population_size_density_biomass	NINA	Erling_Solberg	Erling.Solberg@nina.no	1	1	1	1	1	Yes	0	0	0	100	0	0	0	0	0	100	NA	Mammals	Vertebrate	NA	NA	NA	H	3	PCF	0	0	0	0	0	1	0	0	0	0	0	0	0	Carrying_capacity	OPT	NA
forest	etasjemose_granskog	Hylocomium_splendens	Stair-step_Moss	area	area_coverage_occurence	Skog_og_landskap	Tonje_Økland	tonje.okland@skogoglandskap.no_	1	1	1	1	1	Yes	0	0	0	100	0	0	0	0	0	100	NA	Bryophyta	Plant	NA	No	Yes	PP	5	PP_gen	0	0	1	0	0	0	0	0	0	0	0	0	0	Pristine	OPT	NA
forest	fakkeltvebladmose	Scapania_apiculata	NA	Geographical_extent	area_coverage_occurence	VM/rødliste	Kristian_Hassel	kristian.hassel@vm.ntnu.no	1	1	1	1	0	Yes	0	0	0	100	0	0	0	0	0	100	NA	Bryophyta	Plant	VU	No	No	PP	1	PP_spe	1	0	0	0	0	0	1	0	0	0	1	0	0	past_knowledge	LOW	NA
forest	fiolgubbe	Gomphus_clavatus	NA	percentage_of_the_reference	expert_relative_assessment	NINA,_rødliste	Tor_Brandrud	tor.brandrud@nina.no	1	1	1	1	1	Yes	0	0	0	100	0	0	0	0	0	100	NA	Fungi	Fungi	NT	No	Yes	Mi	1	PP_spe	1	1	0	0	0	0	0	0	0	0	0	0	0	past_knowledge	LOW	NA
forest	fugletelg_fjellbjorkeskog	Gymnocarpium_dryopteris	Oak_Fern_in_alpine_birch_forest	area	area_coverage_occurence	NINA	Per_Arild_Aarrestad	per.a.aarrestad@nina.no	1	1	1	1	1	Yes	0	0	0	100	0	0	0	0	0	100	NA	Polypodiopsida	Plant	NA	No	No	PP	4	PP_gen	1	0	1	0	0	0	0	0	0	1	0	1	0	Pristine	LOW	NA
forest	fugletelg_granskog	Gymnocarpium_dryopteris	Oak_Fern_in_spruce_forest	area	area_coverage_occurence	Skog_og_landskap	Tonje_Økland	tonje.okland@skogoglandskap.no_	1	1	1	1	1	Yes	0	0	0	100	0	0	0	0	0	100	NA	Polypodiopsida	Plant	NA	No	no	PP	3	PP_gen	0	0	0	1	0	0	0	0	0	0	0	0	0	Pristine	LOW	NA
forest	gamle_tre_MiS	NA	Old_trees,_MiS	area	area_coverage_occurence	Skog_og_landskap	Jan_Erik_Nilsen	jan-erik.nilsen@skogoglandskap.no	1	1	1	1	1	Yes	0	0	0	100	0	0	0	0	0	100	NA	Insects	NA	NA	NA	NA	IC	NA	Ext	1	0	0	0	0	0	0	0	0	0	0	0	1	Pristine	LOW	NA
forest	gaupe	Lynx_lynx	Lynx	reproductive_unit	population_size_density_biomass	NINA	Henrik_Brøseth	Henrik.Brøseth@nina.no	1	1	1	1	1	Yes	0	0	0	100	0	0	0	0	0	100	NA	Mammals	Vertebrate	NA	Yes	Yes	TP	2	TP_spe	1	1	0	0	0	1	0	0	0	0	0	1	0	Carrying_capacity	OPT	1
forest	gronn_faresopp	Albatrellus_cristatus_	NA	percentage_of_the_reference	expert_relative_assessment	NINA,_rødliste	Tor_Brandrud	tor.brandrud@nina.no	1	1	1	1	1	Yes	0	0	0	100	0	0	0	0	0	100	NA	Fungi	Fungi	VU	No	Yes	Mi	1	PP_spe	1	1	0	0	0	0	0	0	0	0	1	0	0	past_knowledge	LOW	NA
forest	gronn_orebladbille	Plagiosterna_aenea	NA	occurence	area_coverage_occurence	NINA,_rødliste	Frode_Ødegaard	frode.odegaard@nina.no	1	1	1	1	1	Yes	0	0	0	100	0	0	0	0	0	100	NA	Insects	Invertebrate	NT	No	Yes	H	1	PCF	0	0	0	0	0	0	0	0	0	0	0	1	0	Pristine	OPT	NA
forest	hjort	Cervus_elaphus	red_deer	density	population_size_density_biomass	NINA	Erling_Solberg	Erling.Solberg@nina.no	1	1	1	1	1	Yes	0	0	0	100	0	0	0	0	0	100	NA	Mammals	Vertebrate	NA	NA	NA	H	3	PCF	0	0	0	0	0	1	0	0	0	0	0	0	0	Carrying_capacity	OPT	NA
forest	huldretorvmose	Sphagnum_wulfianum	NA	Geographical_extent	area_coverage_occurence	VM/rødliste	Kristian_Hassel	kristian.hassel@vm.ntnu.no	1	0	0	1	1	Yes	0	0	0	100	0	0	0	0	0	100	NA	Bryophyta	Plant	EN	No	No	PP	1	PP_spe	1	0	0	0	0	0	0	0	0	0	1	0	0	past_knowledge	LOW	NA
forest	istervier	Salix_pentandra	Bay_Willow	percentage_of_the_reference	expert_relative_assessment	NINA	Jarle_W._Bjerke	jarle.werner.bjerke@nina.no	1	1	1	1	1	Yes	0	0	0	100	0	0	0	0	0	100	NA	Angiosperma	Plant	NA	No	Yes	PP	3	PP_gen	1	1	0	0	0	0	1	0	0	0	0	1	0	past_knowledge	LOW	NA
forest	jordstjerner	Geastrum_sp._	NA	percentage_of_the_reference	expert_relative_assessment	NINA,_rødliste	Tor_Brandrud	tor.brandrud@nina.no	1	1	1	1	1	Yes	0	0	0	100	0	0	0	0	0	100	NA	Fungi	Fungi	NA	No	no	Mi	2	Dec	1	1	0	0	0	0	0	0	0	0	0	0	0	past_knowledge	LOW	NA
forest	kopperrod_slorsopp	Cortinarius_cupreorufus	NA	percentage_of_the_reference	expert_relative_assessment	NINA,_rødliste	Tor_Brandrud	tor.brandrud@nina.no	1	1	1	1	1	Yes	0	0	0	100	0	0	0	0	0	100	NA	Fungi	Fungi	NT	No	Yes	Mi	2	PP_spe	1	1	0	0	0	0	0	0	0	0	0	0	0	past_knowledge	LOW	NA
forest	kusymre	Primula_vulgaris	Wild_Primrose	area	area_coverage_occurence	NINA	Odd_Stabbetorp/Olav_Skarpaas/Ander_Often	olav.skarpaas@nina.no	1	1	1	1	1	No	20	0	0	80	0	0	0	0	0	80	NA	Angiosperma	Plant	NA	No	No	PP	3	PP_gen	1	1	1	0	0	0	0	0	0	1	0	0	0	Pristine	LOW	NA
forest	kvistlav_fjellbjorkeskog	Hypogymnia_physodes	No	area	area_coverage_occurence	NINA	Inga_Bruteig	Inga.Bruteig@nina.no	1	1	1	1	1	Yes	0	0	0	100	0	0	0	0	0	100	NA	Lichens	Fungi	LC	No	Yes	Mi	5	PP_gen	0	0	1	0	0	0	0	0	0	0	0	0	0	Maximum_sustainable_level	MAX	NA
forest	lappkjuke_	Amylocystis_lapponicus	NA	percentage_of_the_reference	expert_relative_assessment	NINA,_rødliste	Tor_Brandrud	tor.brandrud@nina.no	1	1	1	1	1	Yes	0	0	0	100	0	0	0	0	0	100	NA	Fungi	Fungi	EN	No	no	Mi	1	Dec	1	1	0	0	0	0	0	0	0	0	1	0	0	past_knowledge	LOW	NA
forest	liggende_dod_ved_MiS	NA	deadwood,_laying_"timber"	area	area_coverage_occurence	Skog_og_landskap	Jan_Erik_Nilsen	jan-erik.nilsen@skogoglandskap.no	1	1	1	1	1	Yes	0	0	0	100	0	0	0	0	0	100	NA	Fungi	NA	NA	NA	NA	IC	NA	Ext	1	0	0	0	0	0	0	0	0	0	0	0	1	Pristine	LOW	NA
forest	lirype	Lagopus_lagopus	Willow_ptarmigan	density	population_size_density_biomass	NINA	Hans_C_Pedersen	hans.pedersen@nina.no	1	1	1	1	1	No	0	0	0	30	70	0	0	0	0	70	NA	Bird	Vertebrate	NA	NA	NA	H	2	PCF	1	0	0	0	0	1	0	0	0	0	0	0	0	Carrying_capacity	LOW	NA
forest	lobaria-arter_i_skog_	Lobaria_spp.	Lobaria-species_in_forests	percentage_of_the_reference	expert_relative_assessment	NINA	Jarle_W._Bjerke	jarle.werner.bjerke@nina.no	1	1	1	1	1	Yes	0	0	0	100	0	0	0	0	0	100	NA	Lichens	Fungi	VU	No	Yes	Mi	1	PP_spe	1	1	0	1	0	0	1	0	0	0	1	0	0	past_knowledge	LOW	NA
forest	moseart_Neckera_pennata	Neckera_pennata	NA	Geographical_extent	area_coverage_occurence	VM/rødliste	Kristian_Hassel	kristian.hassel@vm.ntnu.no	1	1	0	0	0	Yes	0	0	0	100	0	0	0	0	0	100	NA	Bryophyta	Plant	NA	No	No	PP	1	PP_spe	1	0	0	0	0	0	1	0	0	0	0	0	0	past_knowledge	LOW	NA
forest	olavsstake	Moneses_uniflora	One-flowered_Wintergreen	area	area_coverage_occurence	NINA	Odd_Stabbetorp/Olav_Skarpaas/Ander_Often	olav.skarpaas@nina.no	1	1	1	1	1	Yes	0	0	0	100	0	0	0	0	0	100	NA	Angiosperma	Plant	NA	No	No	PP	2	PP_spe	1	1	0	0	0	0	0	0	0	0	0	0	0	Pristine	LOW	NA
forest	pelsblæremose	Frullania_bolanderi	NA	Geographical_extent	area_coverage_occurence	VM/rødliste	Kristian_Hassel	kristian.hassel@vm.ntnu.no	1	1	0	1	0	Yes	0	0	0	100	0	0	0	0	0	100	NA	Bryophyta	Plant	VU	No	No	PP	1	PP_spe	1	0	0	0	0	0	1	0	0	0	1	0	0	past_knowledge	LOW	NA
forest	radyr	Capreolus_capreolus	European_Roe_Deer	density	population_size_density_biomass	NINA	Erling_Solberg	Erling.Solberg@nina.no	1	1	1	1	1	Yes	0	0	0	100	0	0	0	0	0	100	NA	Mammals	Vertebrate	NA	NA	NA	H	2	PCF	0	0	0	0	0	0	0	0	0	0	0	0	0	Carrying_capacity	OPT	NA
forest	reliktbukk	Notorhina_punctata	NA	occurence	area_coverage_occurence	NINA,_rødliste	Frode_Ødegaard	frode.odegaard@nina.no	1	1	0	1	1	Yes	0	0	0	100	0	0	0	0	0	100	NA	Insects	Invertebrate	NT	No	Yes	H	1	PCF	1	0	0	0	0	0	0	0	0	0	0	0	0	Pristine	LOW	NA
forest	rikbarkstre_MiS	NA	NA	area	area_coverage_occurence	Skog_og_landskap	Jan_Erik_Nilsen	jan-erik.nilsen@skogoglandskap.no	1	1	1	1	1	Yes	0	0	0	100	0	0	0	0	0	100	NA	Lichens	NA	NA	NA	NA	PP	NA	PP_spe	1	0	0	0	0	0	0	0	0	0	0	0	1	Pristine	LOW	NA
forest	setertrompetmose	Tayloria_splachnoides	NA	Geographical_extent	area_coverage_occurence	VM/rødliste	Kristian_Hassel	kristian.hassel@vm.ntnu.no	1	1	0	1	1	Yes	0	0	0	100	0	0	0	0	0	100	NA	Bryophyta	Plant	NT	No	No	PP	1	PP_spe	0	1	0	0	0	0	0	0	0	0	0	0	0	past_knowledge	LOW	NA
forest	sinoberbille	Cujucus_cinnaberinus	NA	occurence	area_coverage_occurence	NINA,_rødliste	Frode_Ødegaard	frode.odegaard@nina.no	1	1	0	0	0	Yes	0	0	0	100	0	0	0	0	0	100	NA	Insects	Invertebrate	VU	No	Yes	IC	1	IC_spe	1	1	0	0	0	0	0	0	0	0	1	0	0	Pristine	LOW	NA
forest	smelleren_Harminius_undulatus	Harminius_undulatus	NA	occurence	area_coverage_occurence	NINA,_rødliste	Frode_Ødegaard	frode.odegaard@nina.no	0	0	0	1	1	Yes	0	0	0	100	0	0	0	0	0	100	NA	Insects	Invertebrate	NT	No	Yes	IC	1	IC_spe	1	0	0	0	0	0	0	0	0	0	0	0	0	Pristine	LOW	NA
forest	smyle_fjellbjorkeskog	Avenella_flexuosa	Wayvy_Hairgrass_-_subalpine_birch_forest	area	area_coverage_occurence	NINA	Per_Arild_Aarrestad	per.a.aarrestad@nina.no	1	1	1	1	1	Yes	0	0	0	100	0	0	0	0	0	100	NA	Angiosperma	Plant	NA	No	No	PP	4	PP_gen	0	0	0	0	0	0	0	0	1	0	0	1	0	Pristine	OPT	NA
forest	smyle_granskog	Deschampsia_flexuosa	Wayvy_Hairgrass_-_spruce_forest	area	area_coverage_occurence	Skog_og_landskap	Tonje_Økland	tonje.okland@skogoglandskap.no_	1	1	1	1	1	Yes	0	0	0	100	0	0	0	0	0	100	NA	Angiosperma	Plant	NA	No	no	PP	5	PP_gen	0	0	0	0	0	0	0	0	1	0	0	0	0	Pristine	OPT	NA
forest	snomallav_fjellbjorkeskog	Melanohalea_olivacea	NA	area	area_coverage_occurence	NINA	Inga_Bruteig	Inga.Bruteig@nina.no	1	1	1	1	1	Yes	0	0	0	100	0	0	0	0	0	100	NA	Lichens	Fungi	LC	No	Yes	Mi	2	PP_gen	0	0	1	0	0	0	0	0	0	0	0	0	0	Precautionary_level	LOW	NA
forest	staende_dod_ved_MIS	NA	deadwood,_standing	area	area_coverage_occurence	Skog_og_landskap	Jan_Erik_Nilsen	jan-erik.nilsen@skogoglandskap.no	1	1	1	1	1	Yes	0	0	0	100	0	0	0	0	0	100	NA	Insects	NA	NA	NA	NA	IC	NA	Ext	1	0	0	0	0	0	0	0	0	0	0	0	1	Pristine	LOW	NA
forest	storfugl	Tetrao_urogallus	Western_Capercaillie	density	population_size_density_biomass	NINA	Hans_C_Pedersen	hans.pedersen@nina.no	1	1	1	1	1	Yes	0	0	0	100	0	0	0	0	0	100	NA	Bird	Vertebrate	NA	NA	NA	H	2	PCF	1	0	0	0	0	1	0	0	0	0	0	0	0	Carrying_capacity	LOW	NA
forest	storpiggslekten_sopp	Sarcodon_sp.	NA	percentage_of_the_reference	expert_relative_assessment	NINA,_rødliste	Tor_Brandrud	tor.brandrud@nina.no	1	1	1	1	1	Yes	0	0	0	100	0	0	0	0	0	100	NA	Fungi	Fungi	NA	No	Yes	Mi	2	PP_spe	1	1	0	0	0	0	0	0	0	0	0	0	0	past_knowledge	LOW	NA
forest	svartnende_kantarell	Cantharellus_melanoxeros	NA	percentage_of_the_reference	expert_relative_assessment	NINA,_rødliste	Tor_Brandrud	tor.brandrud@nina.no	1	1	1	1	1	Yes	0	0	0	100	0	0	0	0	0	100	NA	Fungi	Fungi	NT	Yes	Yes	Mi	2	PP_spe	1	1	0	0	0	0	0	0	0	0	0	0	0	past_knowledge	LOW	NA
forest	svartsonekjuke	Phellinus_nigrolimitatus	NA	percentage_of_the_reference	expert_relative_assessment	NINA,_rødliste	Tor_Brandrud	tor.brandrud@nina.no	1	1	1	1	1	Yes	0	0	0	100	0	0	0	0	0	100	NA	Fungi	Fungi	NT	No	no	Mi	1	Dec	1	1	0	0	0	0	0	0	0	0	0	0	0	past_knowledge	OPT	NA
forest	tre_med_hengelav_MIS	Bryoria_sp.	trees_with_bryoria_sp	area	area_coverage_occurence	Skog_og_landskap	Jan_Erik_Nilsen	jan-erik.nilsen@skogoglandskap.no	1	1	1	1	1	Yes	0	0	0	100	0	0	0	0	0	100	NA	Lichens	NA	NA	NA	NA	PP	NA	PP_gen	1	0	0	0	0	0	0	0	0	0	0	0	0	Pristine	LOW	NA
forest	ulv	Canis_lupus	Wolf	reproductive_unit	population_size_density_biomass	NINA	Henrik_Brøseth	Henrik.Brøseth@nina.no	1	1	1	1	1	Yes	0	0	0	100	0	0	0	0	0	100	NA	Mammals	Vertebrate	CR	Yes	Yes	TP	3	TP_gen	1	1	0	0	0	1	0	0	0	0	0	1	0	Carrying_capacity	OPT	1
forest	duetrost	Turdus_viscivorus	Mistle_Thrush	percentage_of_the_reference	expert_relative_assessment	NINA	Jan_Ove_Gjershaug	jan.o.gjershaug@nina.no	1	1	1	1	1	Yes	0	0	0	100	0	0	0	0	0	100	NA	Bird	Vertebrate	LC	Yes	no	IC	3	IC_gen	1	0	0	0	0	0	0	0	0	0	0	0	0	Pristine	LOW	NA
forest	dvergspett	Dendrocopos_minor	Lesser_Spotted_Woodpecker	percentage_of_the_reference	expert_relative_assessment	NINA	Jan_Ove_Gjershaug	jan.o.gjershaug@nina.no	1	1	1	1	1	Yes	0	0	0	100	0	0	0	0	0	100	NA	Bird	Vertebrate	VU	Yes	no	IC	3	IC_gen	1	0	0	0	0	0	0	0	0	0	1	0	0	Pristine	LOW	NA
forest	furukorsnebb	Loxia_pytyopsittacus	Parrot_Crossbill	percentage_of_the_reference	expert_relative_assessment	NINA	Jan_Ove_Gjershaug	jan.o.gjershaug@nina.no	1	1	1	1	1	Yes	0	0	0	100	0	0	0	0	0	100	NA	Bird	Vertebrate	LC	Yes	no	H	1	PCF	1	0	0	0	0	0	0	0	0	0	0	0	0	Pristine	LOW	NA
forest	granmeis	Parus_montanus	willow_tit	percentage_of_the_reference	expert_relative_assessment	NINA	Jan_Ove_Gjershaug	jan.o.gjershaug@nina.no	1	1	1	1	1	Yes	0	0	0	100	0	0	0	0	0	100	NA	Bird	Vertebrate	LC	Yes	no	IC	3	IC_gen	1	0	0	0	0	0	0	0	0	0	0	0	0	Pristine	LOW	NA
forest	gransanger	Phylloscopus_collybita	Common_Chiffchaff	percentage_of_the_reference	expert_relative_assessment	NINA	Jan_Ove_Gjershaug	jan.o.gjershaug@nina.no	1	1	1	1	1	Yes	0	0	0	100	0	0	0	0	0	100	NA	Bird	Vertebrate	LC	Yes	no	IC	3	IC_gen	1	0	0	0	0	0	0	0	0	0	0	0	0	Pristine	LOW	NA
forest	honsehauk	Accipiter_gentilis	goshawk	reproductive_unit	population_size_density_biomass	NINA	Torgeir_Nygård	torgeir.nygard@nina.no	1	1	1	1	1	Yes	0	0	0	100	0	0	0	0	0	100	NA	Bird	Vertebrate	VU	No	no	TP	4	TP_gen	1	0	0	0	0	0	0	0	0	0	1	0	0	Pristine	OPT	1
forest	jerpe	Bonasa_bonasia	Hazel_Grouse	percentage_of_the_reference	expert_relative_assessment	NINA	Jan_Ove_Gjershaug	jan.o.gjershaug@nina.no	1	1	0	1	1	Yes	0	0	0	100	0	0	0	0	0	100	NA	Bird	Vertebrate	LC	Yes	no	H	3	PCF	1	0	0	0	0	1	0	0	0	0	0	0	0	Pristine	LOW	NA
forest	kongeorn	Aquila_chrysaetos	golden_eagle	percentage_of_the_reference	expert_relative_assessment	NINA	Jan_Ove_Gjershaug	jan.o.gjershaug@nina.no	1	1	1	1	1	No	0	0	0	80	20	0	0	0	0	80	NA	Bird	Vertebrate	NT	Yes	no	TP	4	TP_gen	1	0	0	0	0	0	0	0	0	0	0	0	0	Pristine	OPT	1
forest	lauvsanger	Phylloscopus_trochilus	Willow_Warbler	percentage_of_the_reference	expert_relative_assessment	NINA	Jan_Ove_Gjershaug	jan.o.gjershaug@nina.no	1	1	1	1	1	Yes	0	0	0	100	0	0	0	0	0	100	NA	Bird	Vertebrate	LC	Yes	no	IC	3	IC_gen	1	0	0	0	0	0	0	0	0	0	0	0	0	Pristine	LOW	NA
forest	maltrost	Turdus_philomelos	Song_Thrush	percentage_of_the_reference	expert_relative_assessment	NINA	Jan_Ove_Gjershaug	jan.o.gjershaug@nina.no	1	1	1	1	1	Yes	0	0	0	100	0	0	0	0	0	100	NA	Bird	Vertebrate	LC	Yes	no	IC	3	IC_gen	1	0	0	0	0	0	0	0	0	0	0	0	0	Pristine	LOW	NA
forest	munk	Sylvia_atricapilla	Blackcap	percentage_of_the_reference	expert_relative_assessment	NINA	Jan_Ove_Gjershaug	jan.o.gjershaug@nina.no	1	1	1	1	1	Yes	0	0	0	100	0	0	0	0	0	100	NA	Bird	Vertebrate	LC	Yes	no	IC	3	IC_gen	1	0	0	0	0	0	0	0	0	0	0	0	0	Pristine	LOW	NA
forest	svarthvit_fluesnapper	Ficedula_hypoleuca	Pied_Flycatcher	percentage_of_the_reference	expert_relative_assessment	NINA	Jan_Ove_Gjershaug	jan.o.gjershaug@nina.no	1	1	1	1	1	No	10	0	0	90	0	0	0	0	0	90	NA	Bird	Vertebrate	LC	Yes	no	IC	3	IC_gen	1	0	0	0	0	0	0	0	0	0	0	0	0	Pristine	LOW	NA
forest	toppmeis	Parus_cristatus	Crested_Tit	percentage_of_the_reference	expert_relative_assessment	NINA	Jan_Ove_Gjershaug	jan.o.gjershaug@nina.no	1	1	1	1	1	Yes	0	0	0	100	0	0	0	0	0	100	NA	Bird	Vertebrate	LC	Yes	no	IC	3	IC_gen	1	0	0	0	0	0	0	0	0	0	0	0	0	Pristine	LOW	NA
forest	tretaspett	Picoides_tridactylus	Eurasian_Three-toed_Woodpecker	percentage_of_the_reference	expert_relative_assessment	NINA	Jan_Ove_Gjershaug	jan.o.gjershaug@nina.no	1	1	1	1	1	Yes	0	0	0	100	0	0	0	0	0	100	NA	Bird	Vertebrate	NT	Yes	no	IC	3	IC_gen	1	0	0	0	0	0	0	0	0	0	0	0	0	Pristine	LOW	NA
forest	Grankorsnebb	Loxia_curvirostra	Loxia_curvirostra	percentage_of_the_reference	expert_relative_assessment	NINA	Jan_Ove_Gjershaug	jan.o.gjershaug@nina.no	1	1	1	0	1	Yes	0	0	0	100	0	0	0	0	0	100	NA	Bird	Vertebrate	LC	Yes	no	H	1	PCF	1	0	0	0	0	0	0	0	0	0	0	0	0	Pristine	LOW	NA
forest	Gulsanger	Hippolais_icterina	Icterine_Warbler	percentage_of_the_reference	expert_relative_assessment	NINA	Jan_Ove_Gjershaug	jan.o.gjershaug@nina.no	1	1	1	1	1	Yes	0	0	0	100	0	0	0	0	0	100	NA	Bird	Vertebrate	LC	Yes	no	IC	3	IC_gen	1	0	0	0	0	0	0	0	0	0	0	0	0	Pristine	LOW	NA
open_lowland	blatopp	Molinia_caerulea	Purple_Moore_Grass	area	area_coverage_occurence	NINA	Per_Arild_Aarrestad	per.a.aarrestad@nina.no	1	1	1	1	1	No	75	0	0	25	0	0	0	0	0	75	NA	Angiosperma	Plant	NA	No	No	PP	3	PP_gen	0	0	0	0	0	0	0	0	1	0	0	1	0	Pristine	OPT	NA
open_lowland	dragehodeglansbille	Meligethes_norvegicus	NA	occurence	area_coverage_occurence	NINA,_rødliste	Frode_Ødegaard	frode.odegaard@nina.no	1	0	0	0	0	Yes	100	0	0	0	0	0	0	0	0	100	NA	Insects	Invertebrate	EN	No	Yes	H	1	PCF	1	1	0	0	0	0	0	0	0	0	1	0	0	Pristine	LOW	NA
open_lowland	engtordivel	Geotrupes_stercorarius	NA	occurence	area_coverage_occurence	NINA,_rødliste	Frode_Ødegaard	frode.odegaard@nina.no	1	1	1	1	1	Yes	100	0	0	0	0	0	0	0	0	100	NA	Insects	Invertebrate	NT	Yes	Yes	D	2	Dec	1	0	0	0	0	0	0	0	0	0	0	1	0	Traditional_management	LOW	NA
open_lowland	glansteppemose	Porella_obtusata	NA	Geographical_extent	area_coverage_occurence	VM/rødliste	Kristian_Hassel	kristian.hassel@vm.ntnu.no	0	0	1	0	0	Yes	100	0	0	0	0	0	0	0	0	100	NA	Marchantiophyta	Plant	EN	No	No	PP	1	PP_spe	0	1	0	0	0	0	0	0	0	0	1	0	0	past_knowledge	LOW	NA
open_lowland	jordtunger	Geoglossum_sp._	NA	percentage_of_the_reference	expert_relative_assessment	NINA,_rødliste	John_Bjarne_Jordal	john.bjarne.jordal@sunndals.net	1	1	1	1	1	Yes	100	0	0	0	0	0	0	0	0	100	NA	Fungi	Fungi	NA	No	No	Mi	2	Dec	1	1	0	0	0	0	0	0	0	0	0	0	0	past_knowledge	LOW	NA
open_lowland	kollesopper	Clavaria_sp.	NA	percentage_of_the_reference	expert_relative_assessment	NINA,_rødliste	John_Bjarne_Jordal	john.bjarne.jordal@sunndals.net	1	1	1	1	1	Yes	100	0	0	0	0	0	0	0	0	100	NA	Fungi	Fungi	NA	No	No	Mi	2	Dec	1	1	0	0	0	0	0	0	0	0	0	0	0	past_knowledge	LOW	NA
open_lowland	kvitkurle	Pseudorchis_albida	Small_White_Orchid	area	area_coverage_occurence	NINA	Odd_Stabbetorp/Olav_Skarpaas/Ander_Often	olav.skarpaas@nina.no	1	1	1	1	1	Yes	100	0	0	0	0	0	0	0	0	100	NA	Angiosperma	Plant	VU	No	No	PP	2	PP_spe	0	1	0	0	0	0	0	1	1	1	1	0	0	Pristine	LOW	NA
open_lowland	mnemosynesommerfugl	Parnassius_mnemosyne	clouded_apollo	abundance	population_size_density_biomass	NINA,_rødliste	Frode_Ødegaard	frode.odegaard@nina.no	0	0	1	1	0	Yes	100	0	0	0	0	0	0	0	0	100	NA	Insects	Invertebrate	VU	No	Yes	H	1	PCF	1	1	1	0	0	0	0	0	0	0	1	0	0	Pristine	LOW	NA
open_lowland	heiflette	Hypnum_jutlandicum	NA	Geographical_extent	area_coverage_occurence	VM/rødliste	Kristian_Hassel	kristian.hassel@vm.ntnu.no	0	1	1	1	1	Yes	100	0	0	0	0	0	0	0	0	100	NA	Bryophyta	Plant	NA	No	No	PP	2	PP_spe	0	1	0	0	0	0	0	0	0	0	0	0	0	past_knowledge	LOW	NA
open_lowland	oljebillen_Meloe_violaceus	Meloe_violaceus	NA	occurence	area_coverage_occurence	NINA,_rødliste	Frode_Ødegaard	frode.odegaard@nina.no	1	1	1	1	1	Yes	100	0	0	0	0	0	0	0	0	100	NA	Insects	Invertebrate	NA	No	Yes	PA	1	Ext	1	0	0	0	0	0	0	0	0	0	0	1	0	Traditional_management	LOW	NA
open_lowland	praktrodskivesopp_	Entoloma_bloxami_	NA	percentage_of_the_reference	expert_relative_assessment	NINA,_rødliste	John_Bjarne_Jordal	john.bjarne.jordal@sunndals.net	1	1	1	1	1	Yes	100	0	0	0	0	0	0	0	0	100	NA	Fungi	Fungi	VU	No	no	Mi	2	Dec	1	1	0	0	0	0	0	0	0	0	1	0	0	past_knowledge	LOW	NA
open_lowland	praktvoksopper	Hygrocybe_sp.	NA	percentage_of_the_reference	expert_relative_assessment	NINA,_rødliste	John_Bjarne_Jordal	john.bjarne.jordal@sunndals.net	1	1	1	1	1	Yes	100	0	0	0	0	0	0	0	0	100	NA	Fungi	Fungi	NA	No	no	Mi	2	Dec	1	1	0	0	0	0	0	0	0	0	0	0	0	past_knowledge	LOW	NA
open_lowland	prestekrage	Leucanthemum_vulgare	Oxeye_Daisy_	area	area_coverage_occurence	NINA	Odd_Stabbetorp/Olav_Skarpaas/Ander_Often	olav.skarpaas@nina.no	1	1	1	1	1	Yes	100	0	0	0	0	0	0	0	0	100	NA	Angiosperma	Plant	NA	No	No	PP	3	PP_gen	0	1	0	0	1	0	0	1	1	0	0	1	0	Pristine	LOW	NA
open_lowland	purpurlyng	Erica_cinerea	Bell_Heather_	area	area_coverage_occurence	NINA	Odd_Stabbetorp/Olav_Skarpaas/Ander_Often	olav.skarpaas@nina.no	0	0	1	1	0	Yes	100	0	0	0	0	0	0	0	0	100	NA	Angiosperma	Plant	NT	No	No	PP	1	PP_spe	1	1	1	0	0	0	0	1	1	0	0	1	0	Pristine	LOW	NA
open_lowland	smaklokkemose	Encalypta_vulgaris	NA	Geographical_extent	area_coverage_occurence	VM/rødliste	Kristian_Hassel	kristian.hassel@vm.ntnu.no	1	1	1	1	0	Yes	100	0	0	0	0	0	0	0	0	100	NA	Bryophyta	Plant	VU	No	No	PP	1	PP_spe	0	1	0	0	0	0	0	0	0	0	1	0	0	past_knowledge	LOW	NA
open_lowland	solblom	Arnica_montana	Arnica	area	area_coverage_occurence	NINA	Odd_Stabbetorp/Olav_Skarpaas/Ander_Often	olav.skarpaas@nina.no	1	1	1	1	0	Yes	100	0	0	0	0	0	0	0	0	100	NA	Angiosperma	Plant	VU	No	No	PP	2	PP_spe	0	0	0	0	0	0	0	1	1	0	1	0	0	Pristine	LOW	NA
open_lowland	tilstand_gras_og_urterik_mark	NA	Semi-natural_grasslands_state	percentage_of_the_reference	expert_relative_assessment	Bioforsk	ekspertgruppe	mange	1	1	1	1	1	Yes	100	0	0	0	0	0	0	0	0	100	NA	Angiosperma	NA	NA	Yes	no	PP	NA	Ext	0	0	1	0	0	0	0	1	1	0	0	0	1	Traditional_management	OPT	NA
open_lowland	tilstand_kystlynghei	NA	Coastal_heathland_state	percentage_of_the_reference	expert_relative_assessment	Bioforsk	ekspertgruppe	mange	1	1	1	1	1	Yes	100	0	0	0	0	0	0	0	0	100	NA	Angiosperma	NA	NA	Yes	no	PP	NA	Ext	0	0	1	0	0	0	0	1	1	0	0	0	1	Traditional_management	OPT	NA
open_lowland	heitorvmose	Sphagnum_strictum	peat_moss_sp.	Geographical_extent	area_coverage_occurence	VM/rødliste	Kristian_Hassel	kristian.hassel@vm.ntnu.no	1	1	1	1	1	Yes	100	0	0	0	0	0	0	0	0	100	NA	Bryophyta	Plant	NA	No	No	PP	2	PP_spe	0	1	0	0	0	0	0	0	0	0	0	0	0	past_knowledge	LOW	NA
open_lowland	graspurv	Passer_domesticus	house_sparrow	percentage_of_the_reference	expert_relative_assessment	NINA	Jan_Ove_Gjershaug	jan.o.gjershaug@nina.no	1	1	1	1	1	Yes	100	0	0	0	0	0	0	0	0	100	NA	Bird	Vertebrate	LC	Yes	no	H	3	PCF	0	0	0	0	0	0	0	0	0	0	0	0	0	Pristine	LOW	NA
open_lowland	gulspurv	Emberiza_citrinella	yellowhammer	percentage_of_the_reference	expert_relative_assessment	NINA	Jan_Ove_Gjershaug	jan.o.gjershaug@nina.no	1	1	1	1	1	Yes	100	0	0	0	0	0	0	0	0	100	NA	Bird	Vertebrate	LC	Yes	no	H	3	PCF	0	0	0	0	0	0	0	0	0	0	0	0	0	Pristine	LOW	NA
open_lowland	havorn	Haliaeetus_albicilla	white-tailed_sea_eagle	percentage_of_the_reference	expert_relative_assessment	NINA	Torgeir_Nygård	torgeir.nygard@nina.no	1	1	1	1	1	Yes	100	0	0	0	0	0	0	0	0	100	NA	Bird	Vertebrate	LC	No	No	TP	4	TP_gen	0	0	0	0	0	0	0	0	0	0	0	0	0	Carrying_capacity	OPT	1
open_lowland	hubro	Bubo_bubo	eurasian_eagle_owl	percentage_of_the_reference	expert_relative_assessment	NINA	Jan_Ove_Gjershaug	jan.o.gjershaug@nina.no	1	1	1	1	1	Yes	100	0	0	0	0	0	0	0	0	100	NA	Bird	Vertebrate	EN	Yes	no	TP	4	TP_gen	0	0	0	0	0	0	0	0	0	0	1	0	0	Pristine	OPT	1
open_lowland	lappiplerke	Anthus_cervinus	NA	percentage_of_the_reference	expert_relative_assessment	NINA	Jan_Ove_Gjershaug	jan.o.gjershaug@nina.no	1	1	1	1	1	Yes	100	0	0	0	0	0	0	0	0	100	NA	Bird	Vertebrate	LC	Yes	no	IC	3	IC_gen	0	0	0	0	0	0	0	0	0	0	0	0	0	Pristine	LOW	NA
open_lowland	sandsvale	Riparia_riparia	sand_martin	percentage_of_the_reference	expert_relative_assessment	NINA	Jan_Ove_Gjershaug	jan.o.gjershaug@nina.no	1	1	1	1	1	Yes	100	0	0	0	0	0	0	0	0	100	NA	Bird	Vertebrate	LC	Yes	no	IC	3	IC_gen	0	0	0	0	0	0	0	0	0	0	0	0	0	Pristine	LOW	NA
open_lowland	sanglerke	Alauda_arvensis	skylark	percentage_of_the_reference	expert_relative_assessment	NINA	Jan_Ove_Gjershaug	jan.o.gjershaug@nina.no	1	1	1	1	1	Yes	100	0	0	0	0	0	0	0	0	100	NA	Bird	Vertebrate	NT	Yes	no	H	3	PCF	0	0	0	0	0	0	0	0	0	0	0	0	0	Pristine	LOW	NA
open_lowland	skjære	Pica_pica	NA	percentage_of_the_reference	expert_relative_assessment	NINA	Jan_Ove_Gjershaug	jan.o.gjershaug@nina.no	1	1	1	1	1	Yes	100	0	0	0	0	0	0	0	0	100	NA	Bird	Vertebrate	LC	Yes	no	IC	4	IC_gen	0	0	0	0	0	0	0	0	0	0	0	0	0	Pristine	LOW	NA
open_lowland	skjaerpiplerke	Anthus_petrosus	rock_pipit	percentage_of_the_reference	expert_relative_assessment	NINA	Jan_Ove_Gjershaug	jan.o.gjershaug@nina.no	1	1	1	1	1	Yes	100	0	0	0	0	0	0	0	0	100	NA	Bird	Vertebrate	LC	Yes	no	IC	3	IC_gen	0	0	0	0	0	0	0	0	0	0	0	0	0	Pristine	LOW	NA
open_lowland	staer	Sturnus_vulgaris	common_starling	percentage_of_the_reference	expert_relative_assessment	NINA	Jan_Ove_Gjershaug	jan.o.gjershaug@nina.no	1	1	1	1	1	Yes	100	0	0	0	0	0	0	0	0	100	NA	Bird	Vertebrate	NT	Yes	no	IC	3	IC_gen	0	0	0	0	0	0	0	0	0	0	0	0	0	Pristine	LOW	NA
open_lowland	storspove	Numenius_arquata	eurasian_curlew	percentage_of_the_reference	expert_relative_assessment	NINA	Jan_Ove_Gjershaug	jan.o.gjershaug@nina.no	1	1	1	1	1	Yes	100	0	0	0	0	0	0	0	0	100	NA	Bird	Vertebrate	NT	Yes	no	IC	3	IC_gen	0	0	0	0	0	0	0	0	0	0	0	0	0	Pristine	LOW	NA
open_lowland	vandrefalk	Falco_peregrinus	peregrine_falcon	percentage_of_the_reference	expert_relative_assessment	NINA	Jan_Ove_Gjershaug	jan.o.gjershaug@nina.no	1	1	1	1	1	Yes	100	0	0	0	0	0	0	0	0	100	NA	Bird	Vertebrate	NT	Yes	no	IC	3	IC_gen	0	0	0	0	0	0	0	0	0	0	0	0	0	Pristine	LOW	NA
open_lowland	vipe	Vanellus_vanellus	northern_lapwing	percentage_of_the_reference	expert_relative_assessment	NINA	Jan_Ove_Gjershaug	jan.o.gjershaug@nina.no	1	1	1	1	1	No	50	0	50	0	0	0	0	0	0	50	NA	Bird	Vertebrate	NT	Yes	no	IC	3	IC_gen	0	0	0	0	0	0	0	0	0	0	0	0	0	Pristine	LOW	NA
[truncated: 2 more columns]
